# Supplementary material for: Biosynthetic studies on the azinomycins: The pathway to the naphthoate fragment
Source: Royal Society of Chemistry journal article supplement (doi:10.1039/b410592c), 2004-01-01

**Supporting Information for:**

**Biosynthetic studies on the azinomycins: The pathway to the naphthoate fragment**

Christophe Corre<sup>#</sup>, Cyrille A.S. Landreau<sup>#</sup>, Michael Shipman<sup>#</sup>, Philip A.S. Lowden<sup>‡</sup>

School of Biological and Chemical Sciences

University of Exeter

Stocker Road

Exeter

EX4 4QD

U.K.

‡ Current Address:

School of Biological and Chemical Sciences

Birkbeck College, University of London

Malet Street

London

WC1E 7HX

U.K.

Tel. +44 (0)20 70790789

Fax. +44 (0)20 76316246

email: p.lowden@bbk.ac.uk

<sup>#</sup>Current Address

Department of Chemistry

University of Warwick

Gibbet Hill Road

Coventry

CV4 7AL

U.K.

Tel +44 (0)24 76523186

Fax +44 (0)24 76524429

Email m.shipman@warwick.ac.uk

## Contents:

Experimental procedures for feeding studies

Spectroscopic data:

<sup>1</sup>H NMR assignments for azinomycin B.

ESMS of azinomycin B after feeding of **4a**, **5a** and **6a**.

<sup>2</sup>H NMR of azinomycin B after feeding of **4a**.

<sup>2</sup>H NMR of azinomycin B after feeding of **5a**.

<sup>2</sup>H NMR of azinomycin B after feeding of **6a**.

<sup>2</sup>H NMR of the mixture of **4a** and **6b** used for competition feeding.

<sup>2</sup>H NMR of azinomycin B after feeding of **4a** and **6b**.

<sup>2</sup>H NMR of the mixture of **5a** and **6b** used for competition feeding.

<sup>2</sup>H NMR of azinomycin B after feeding of **5a** and **6b**.

ESMS of azinomycin B after feeding of **4b**.

<sup>2</sup>H NMR of azinomycin B after feeding of **4b**.

<sup>1</sup>H NMR of azinomycin B after feeding of **4b**.

<sup>1</sup>H NMR spectrum of **6a**.

<sup>2</sup>H NMR spectrum of **6a**.

ESMS spectrum of **6a**.

<sup>1</sup>H NMR spectrum of **5a**.

<sup>2</sup>H NMR spectrum of **5a**.

ESMS spectrum of **5a**.

<sup>1</sup>H NMR spectrum of **4a**.

<sup>2</sup>H NMR spectrum of **4a**.

ESMS spectrum of **4a**.

<sup>1</sup>H NMR spectrum of **6b**.

<sup>2</sup>H NMR spectrum of **6b**.

EIMS spectrum of **6b**.

<sup>1</sup>H NMR spectrum of **4b**.

<sup>2</sup>H NMR spectrum of **4b**.

ESMS spectrum of **4b**.

**Experimental procedures for feeding studies:** A 100 ml seed culture of *S. sahachiroi* (NRRL 2485), maintained on GYM agar plates (glucose monohydrate, 4 g/L; yeast extract, 4 g/L; malt extract, 10 g/L; CaCO<sub>3</sub>, 2 g/L; agar, 12 g/L; tap water to balance; adjusted to pH 6.8 with NaOH, 1 M before sterilisation) at 28 °C, was grown in PS5 medium (Pharmamedia, 5 g/L; starch, 5 g/L; tap water to balance; adjusted to pH 6.0) at 30 °C, 200 rpm for 24 hours then 25 ml was used to inoculate 500 ml of PS5 medium, which was grown at 30 °C, 200 rpm for 72 hours.

Aqueous solutions of labeled precursors as their sodium salts were added through a 0.2 µm filter at concentrations as outlined in the text.

After centrifugation of the cultures, azinomycin B was isolated by extraction of the supernatant (pH 8.0) with an equal volume of chloroform at 4°C, concentration and then a series of precipitations. For each 100 ml of culture, the residue was precipitated from 600 µl chloroform/hexane (1:29), centrifuged at 2000 rpm and the supernatant discarded. This was repeated and then the residue dissolved in 600 µl chloroform/hexane (2:1), centrifuged and the supernatant retained. This residue was then dissolved in 600 µl chloroform/diethyl ether (1:4), centrifuged and the supernatant concentrated to give pure azinomycin B (~1.5 mg per 100 ml).

<sup>1</sup>H NMR spectra were obtained on a Bruker Advance 400 in CDCl<sub>3</sub>, d<sub>6</sub>-acetone or d<sub>6</sub>-DMSO, referenced to solvent. <sup>2</sup>H NMR spectra were obtained on a Bruker Advance 400 in CHCl<sub>3</sub>, referenced to d<sub>6</sub>-acetone. Electrospray ionisation mass spectrometry (ESI-MS) was performed on a MicroMass Platform LC. Samples were prepared in a solution generating positive ions (acetonitrile/H<sub>2</sub>O 50:50 + 1% formic acid).

### <sup>1</sup>H NMR assignments for azinomycin B.

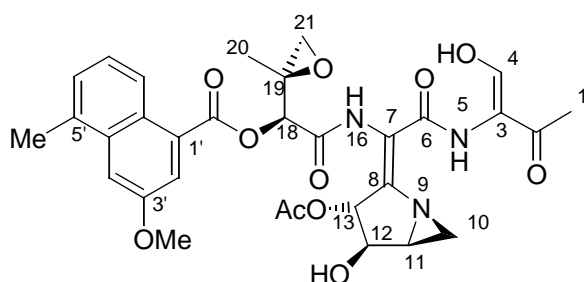

$\delta_{\text{H}}$  (400 MHz; CDCl<sub>3</sub>) 12.47 (1 H, br s, OH-4), 12.47 (1 H, s, H-5), 8.55 (1 H, dd, *J* 7.0, 3.6, H-8'), 8.20 (1 H, br s, H-16), 7.94 (1 H, d, *J* 2.9, H-2'), 7.48 (1H, d, *J* 2.5 Hz, H-4'), 7.32 (1 H, m, H-7'), 7.32 (1 H, m, H-6'), 5.50 (1 H, d, *J* 4.0, H-13), 5.12 (1 H, s, H-18), 4.64 (1 H, dd, *J* 4.8, 4.0, H-12), 3.96 (3 H, s, OCH<sub>3</sub>-3'), 3.96 (1 H, OH-12), 3.36 (1 H, m, H-11), 2.98 (1 H, d, *J* 4.3, H-21b), 2.80 (1 H, d, *J* 4.3, H-21a), 2.70 (1 H, H-10b), 2.68 (3 H, s, CH<sub>3</sub>-5'), 2.30 (1 H, H-10a), 2.30 (3 H, s, CH<sub>3</sub>-1), 2.20 (3 H, s, CH<sub>3</sub>-15), and 1.53 (3 H, s, CH<sub>3</sub>-20).

ESMS of azinomycin B after feeding of **4a**, **5a** and **6a**.

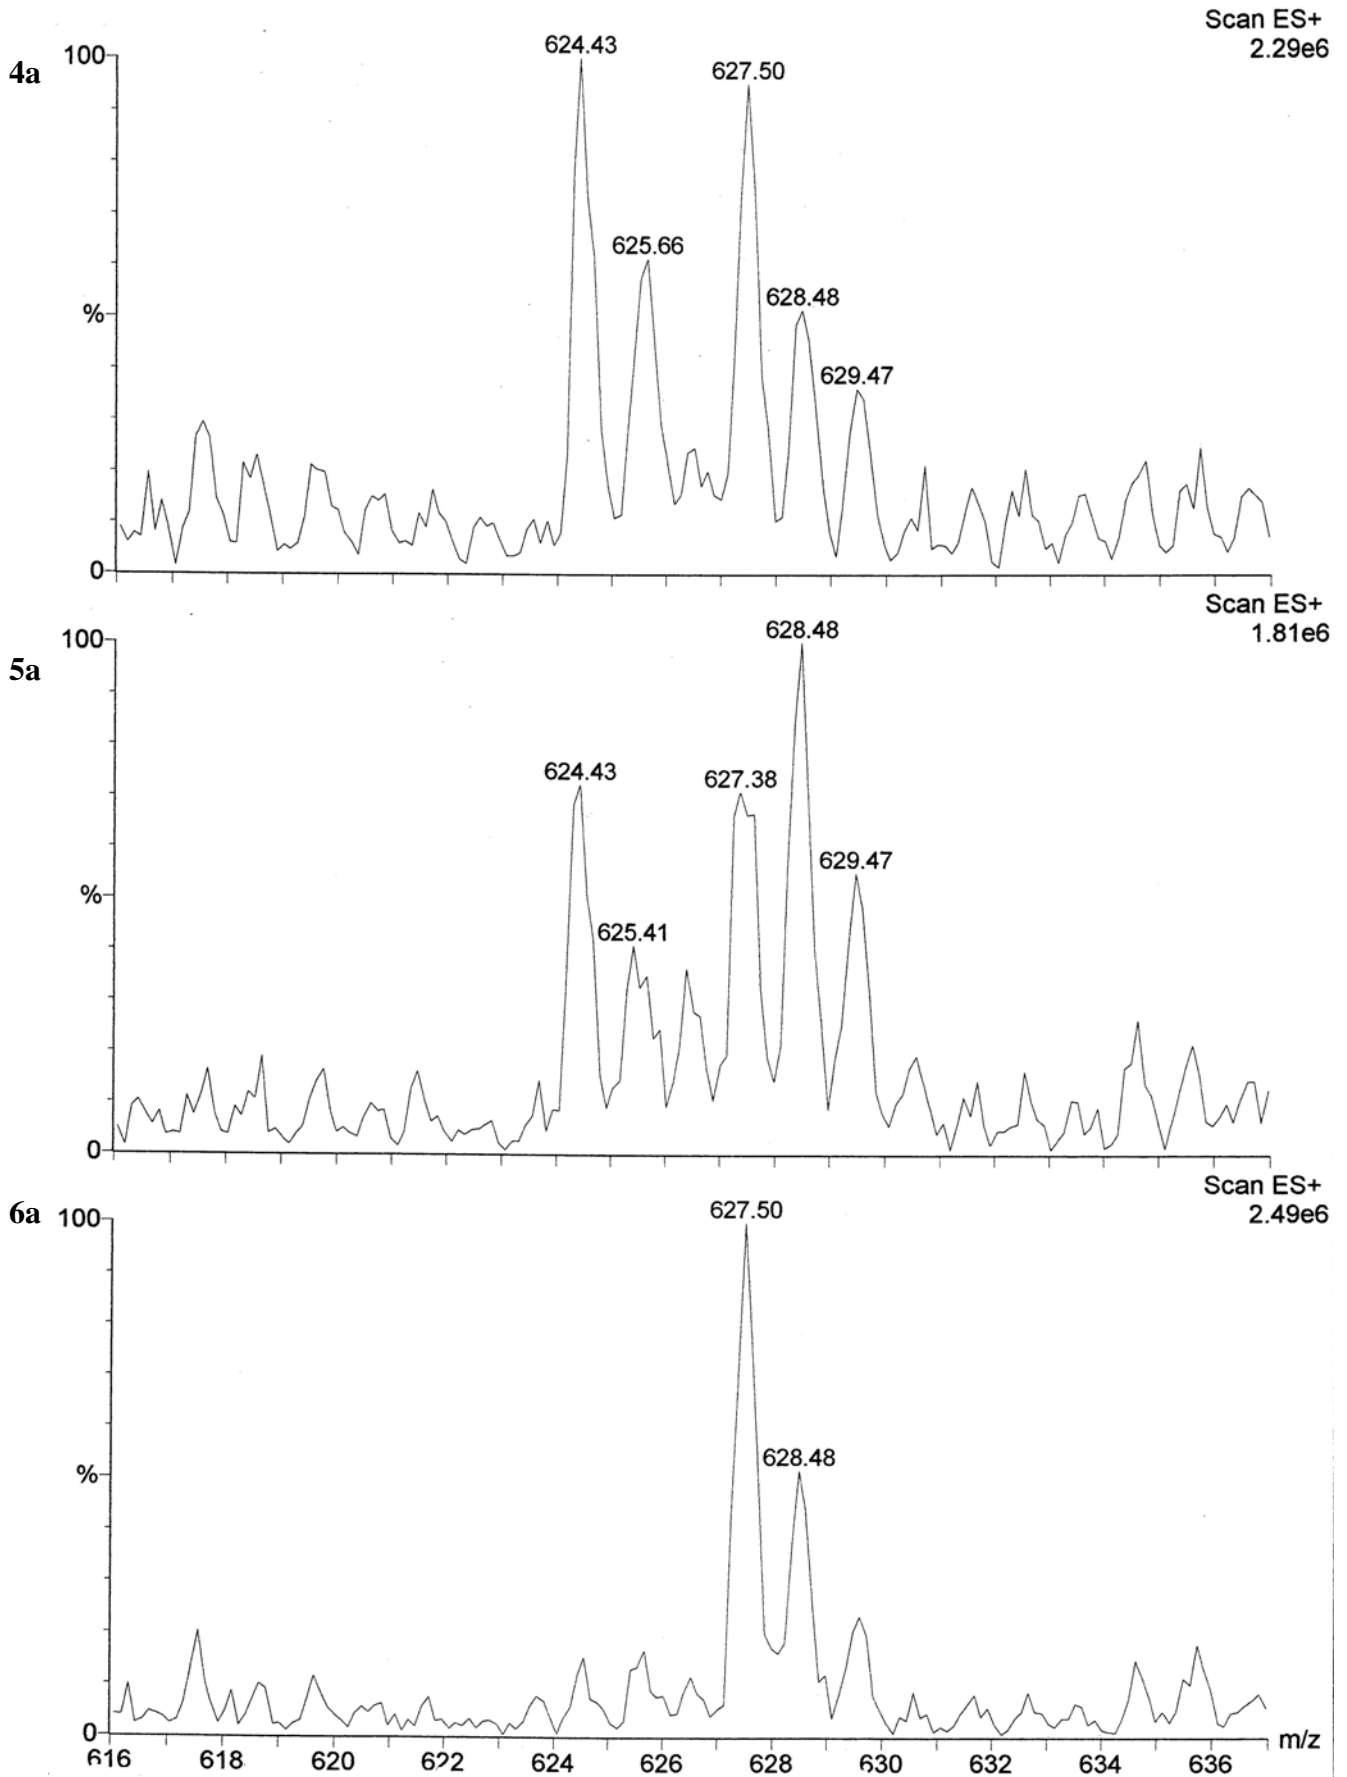

$^2\text{H}$  NMR of azinomycin B after feeding of **4a**.

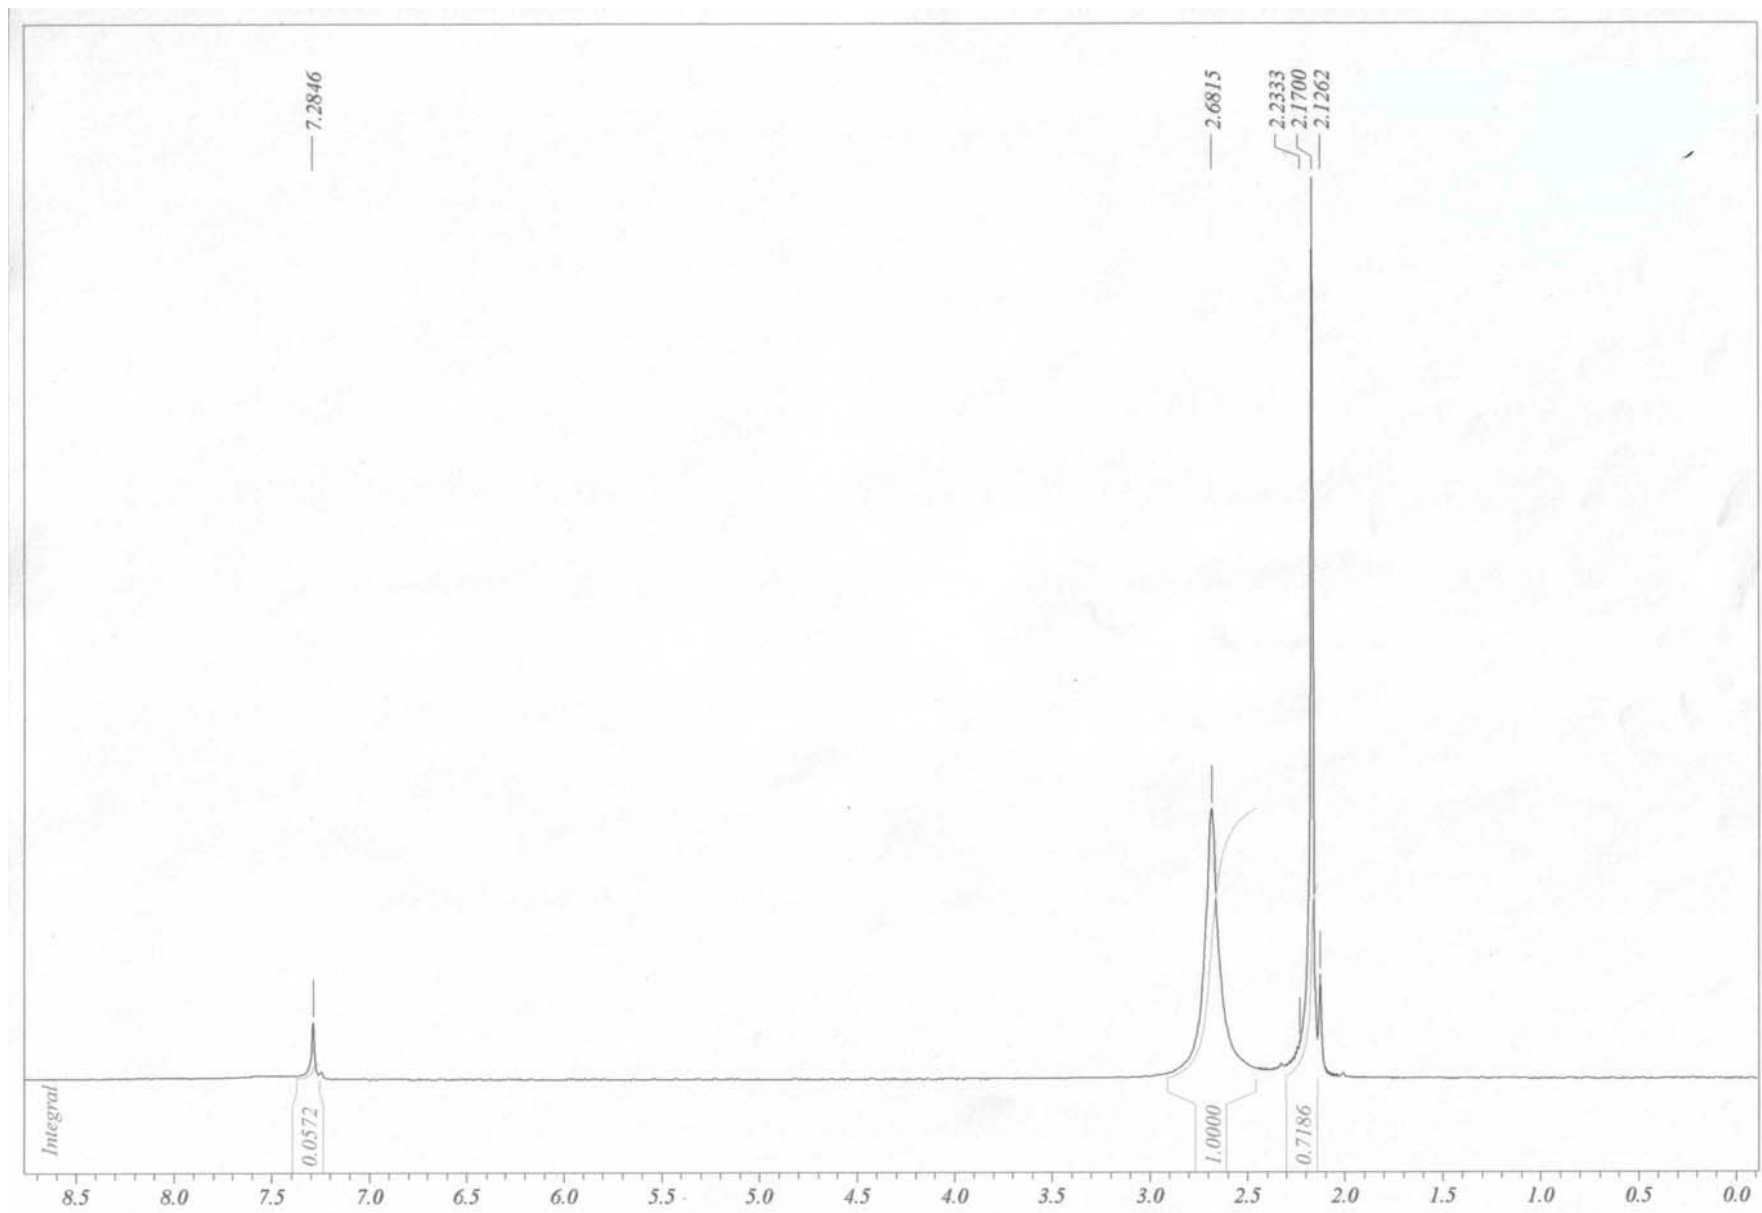

$^2\text{H}$  NMR of azinomycin B after feeding of **5a**.

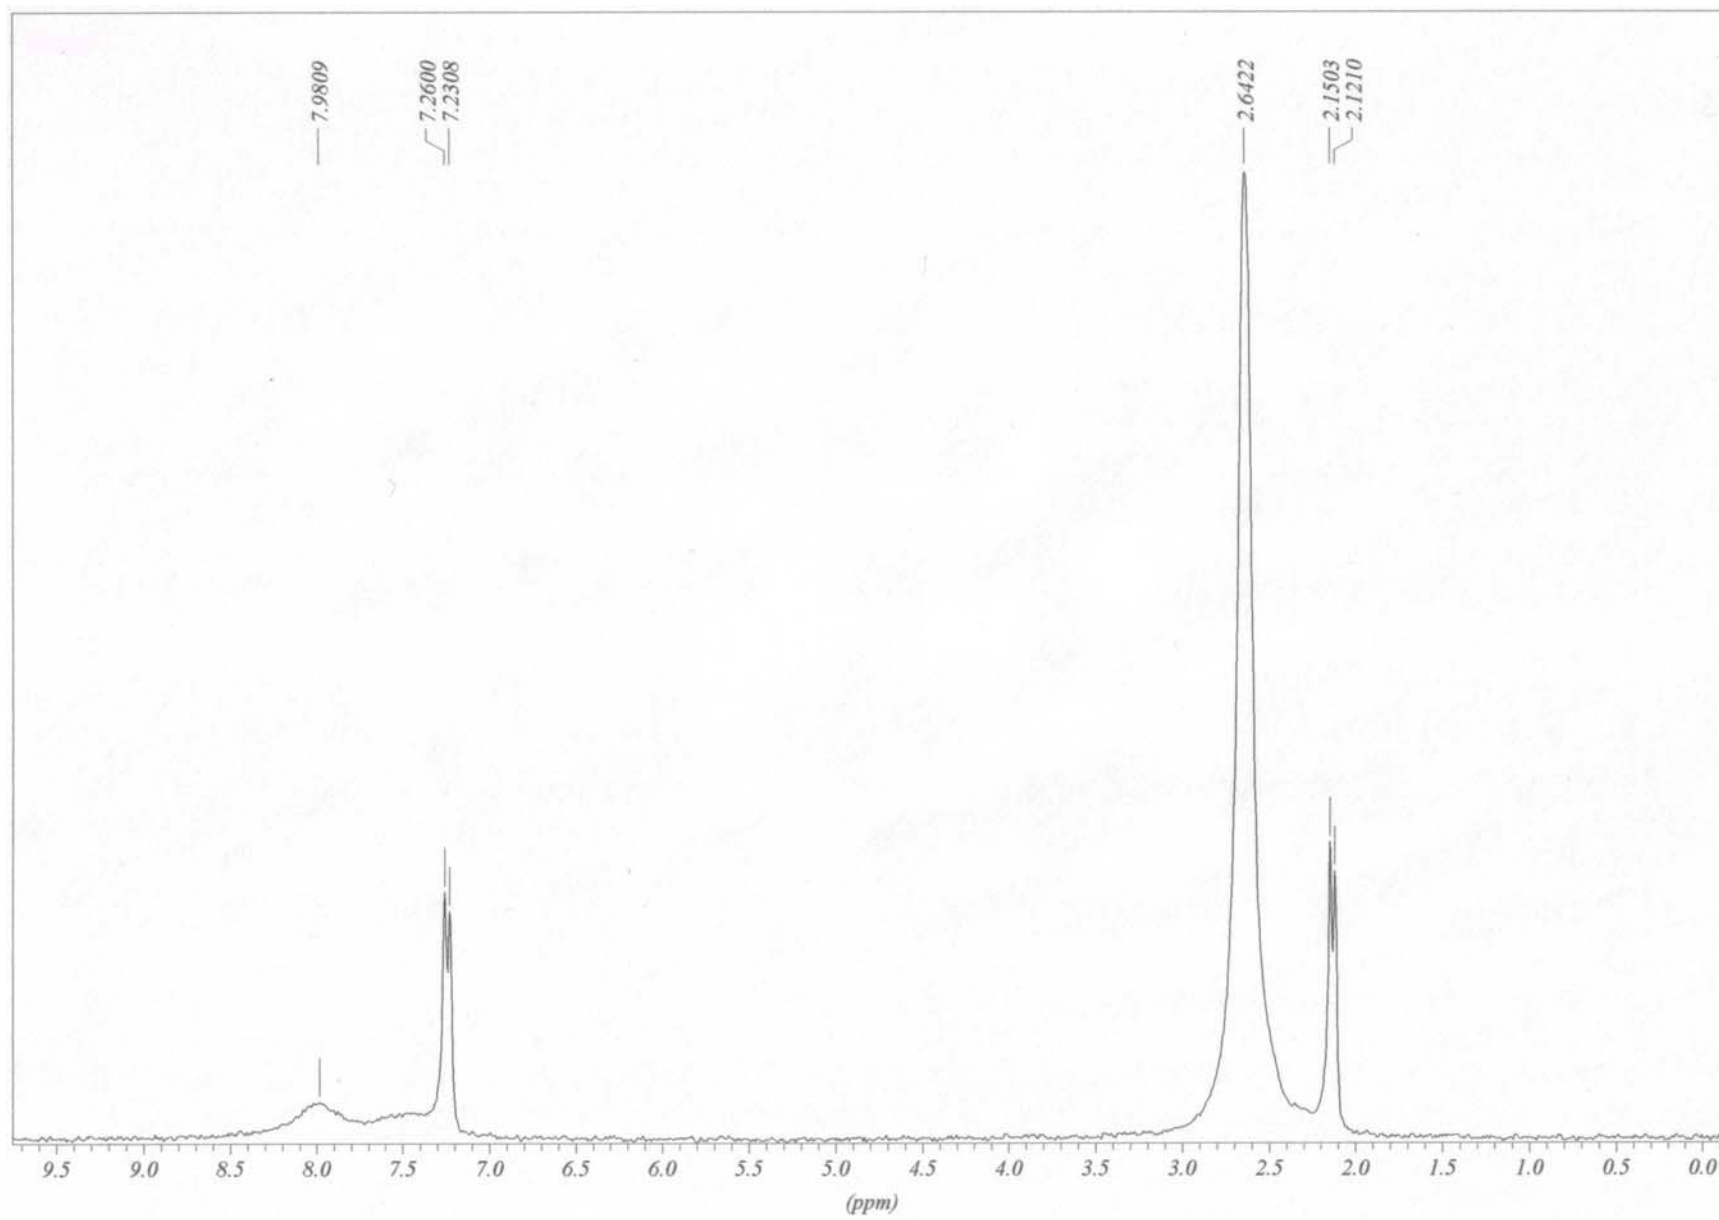

$^2\text{H}$  NMR of azinomycin B after feeding of **6a**.

Current Data Parameters  
 NAME dapr  
 EXPNO 2  
 PROCNO 1  
 Date\_ 20030401  
 Time 16.43  
 INSTRUM spect  
 PROBHD 5 mm Multinu  
 PULPROG zgpg  
 TD 4096  
 SOLVENT CDC13  
 NS 10240  
 DS 2  
 SWH 1225.494 Hz  
 FIDRES 0.299193 Hz  
 AQ 1.6712135 sec  
 RG 4597.6  
 DM 407.999 usec  
 DE 100.00 usec  
 TE 303.0 K  
 D1 0.10000000 sec  
 d11 0.03000000 sec  
 d12 0.00002000 sec

----- CHANNEL f1 -----  
 NUC1 2H  
 P1 10.00 usec  
 PL1 0.00 dB  
 SF01 61.4225556 MHz

----- CHANNEL f2 -----  
 CPDPRG2 waltz16  
 NUC2 1H  
 PCPD2 88.00 usec  
 PL2 0.00 dB  
 PL12 17.00 dB  
 PL13 17.00 dB  
 SF02 400.1320007 MHz

F2 - Processing parameters  
 SI 4096  
 SF 61.4223927 MHz  
 MDW EM  
 SSB 0  
 LB 0.40 Hz  
 GB 0  
 PC 0.50

1D-NMR plot parameters  
 CX 38.00 cm  
 F1P 9.800 ppm  
 F1 601.94 Hz  
 F2P -0.200 ppm  
 F2 -12.28 Hz  
 PPMCM 0.26316 ppm/cm  
 HZCM 16.16379 Hz/cm

Integrat

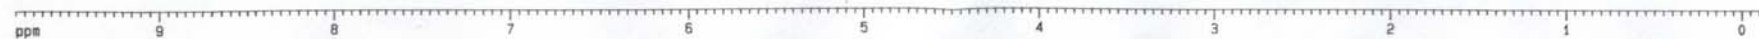

$^2\text{H}$  NMR of the mixture of **4a** and **6b** used for competition feeding.

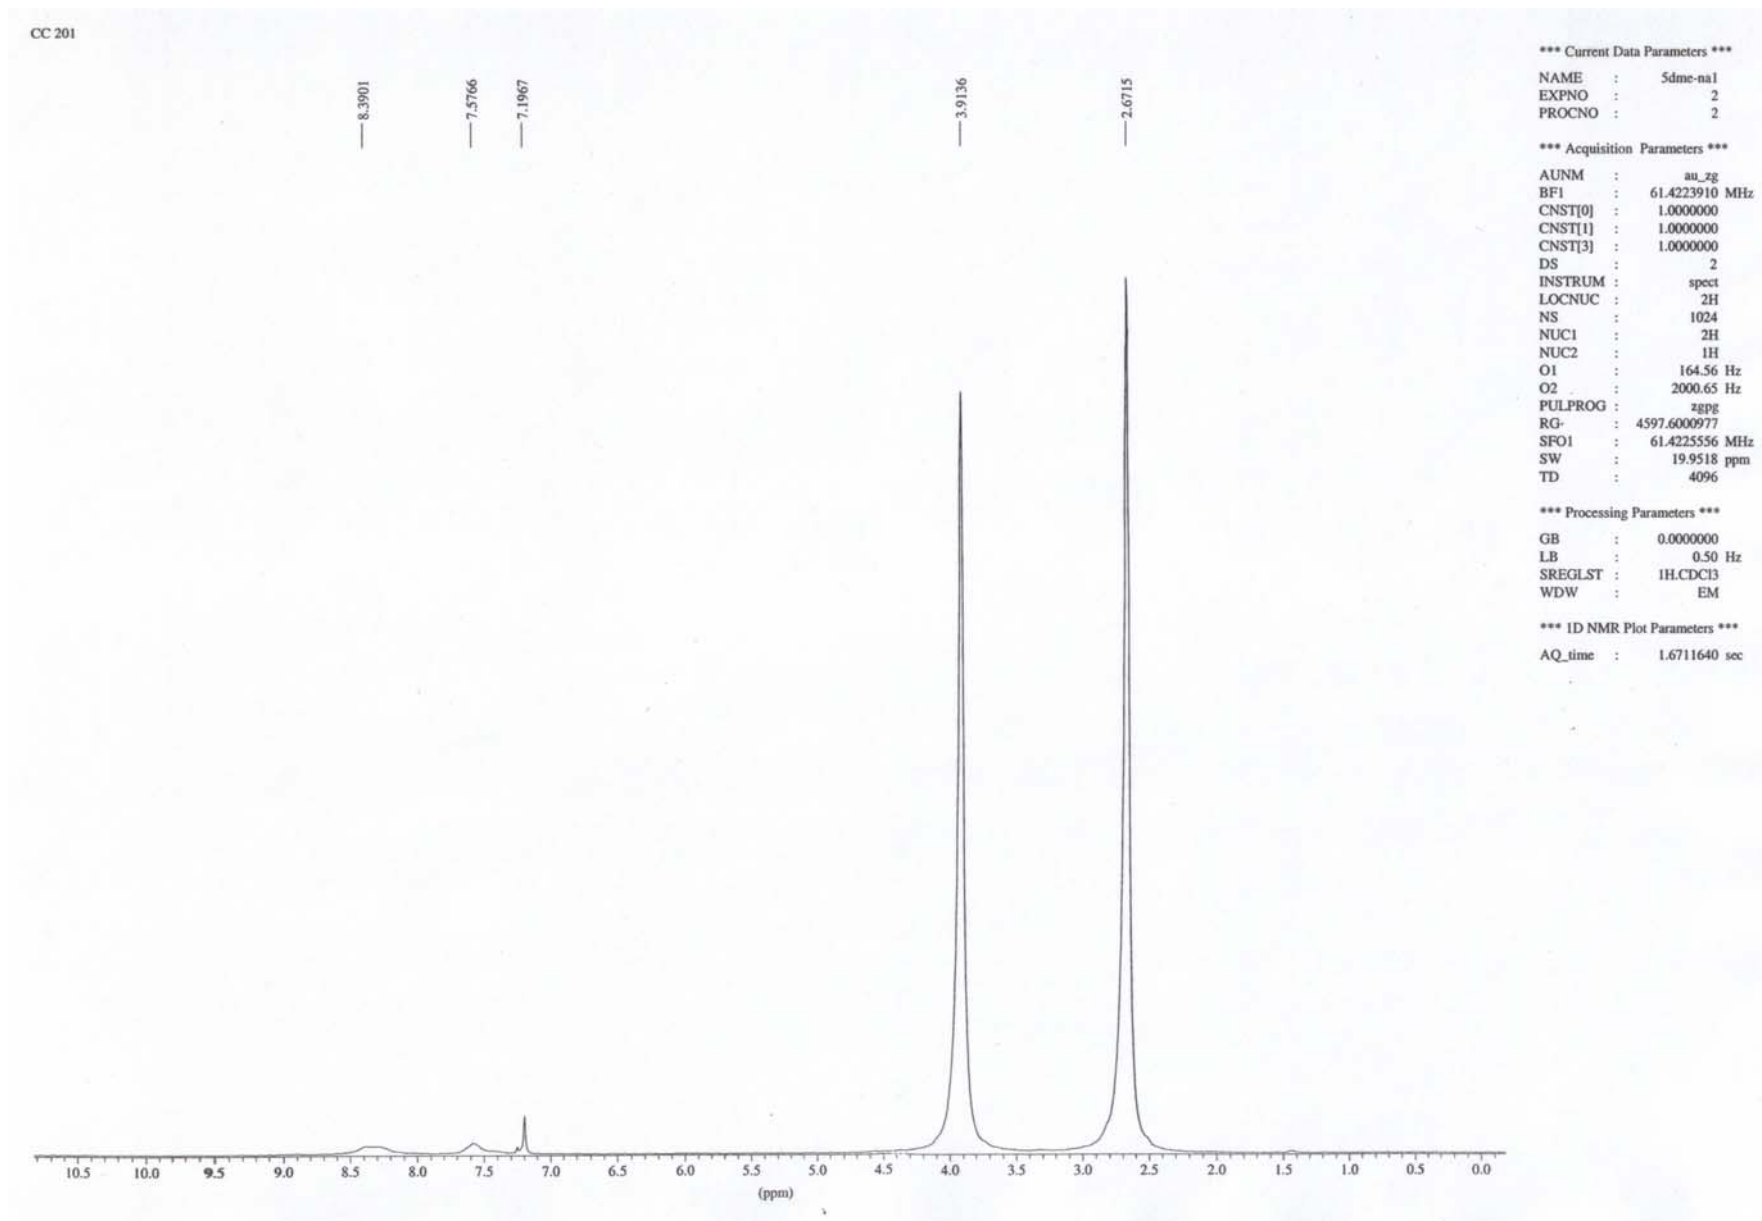



$^2\text{H}$  NMR of azinomycin B after feeding of **4a** and **6b**.

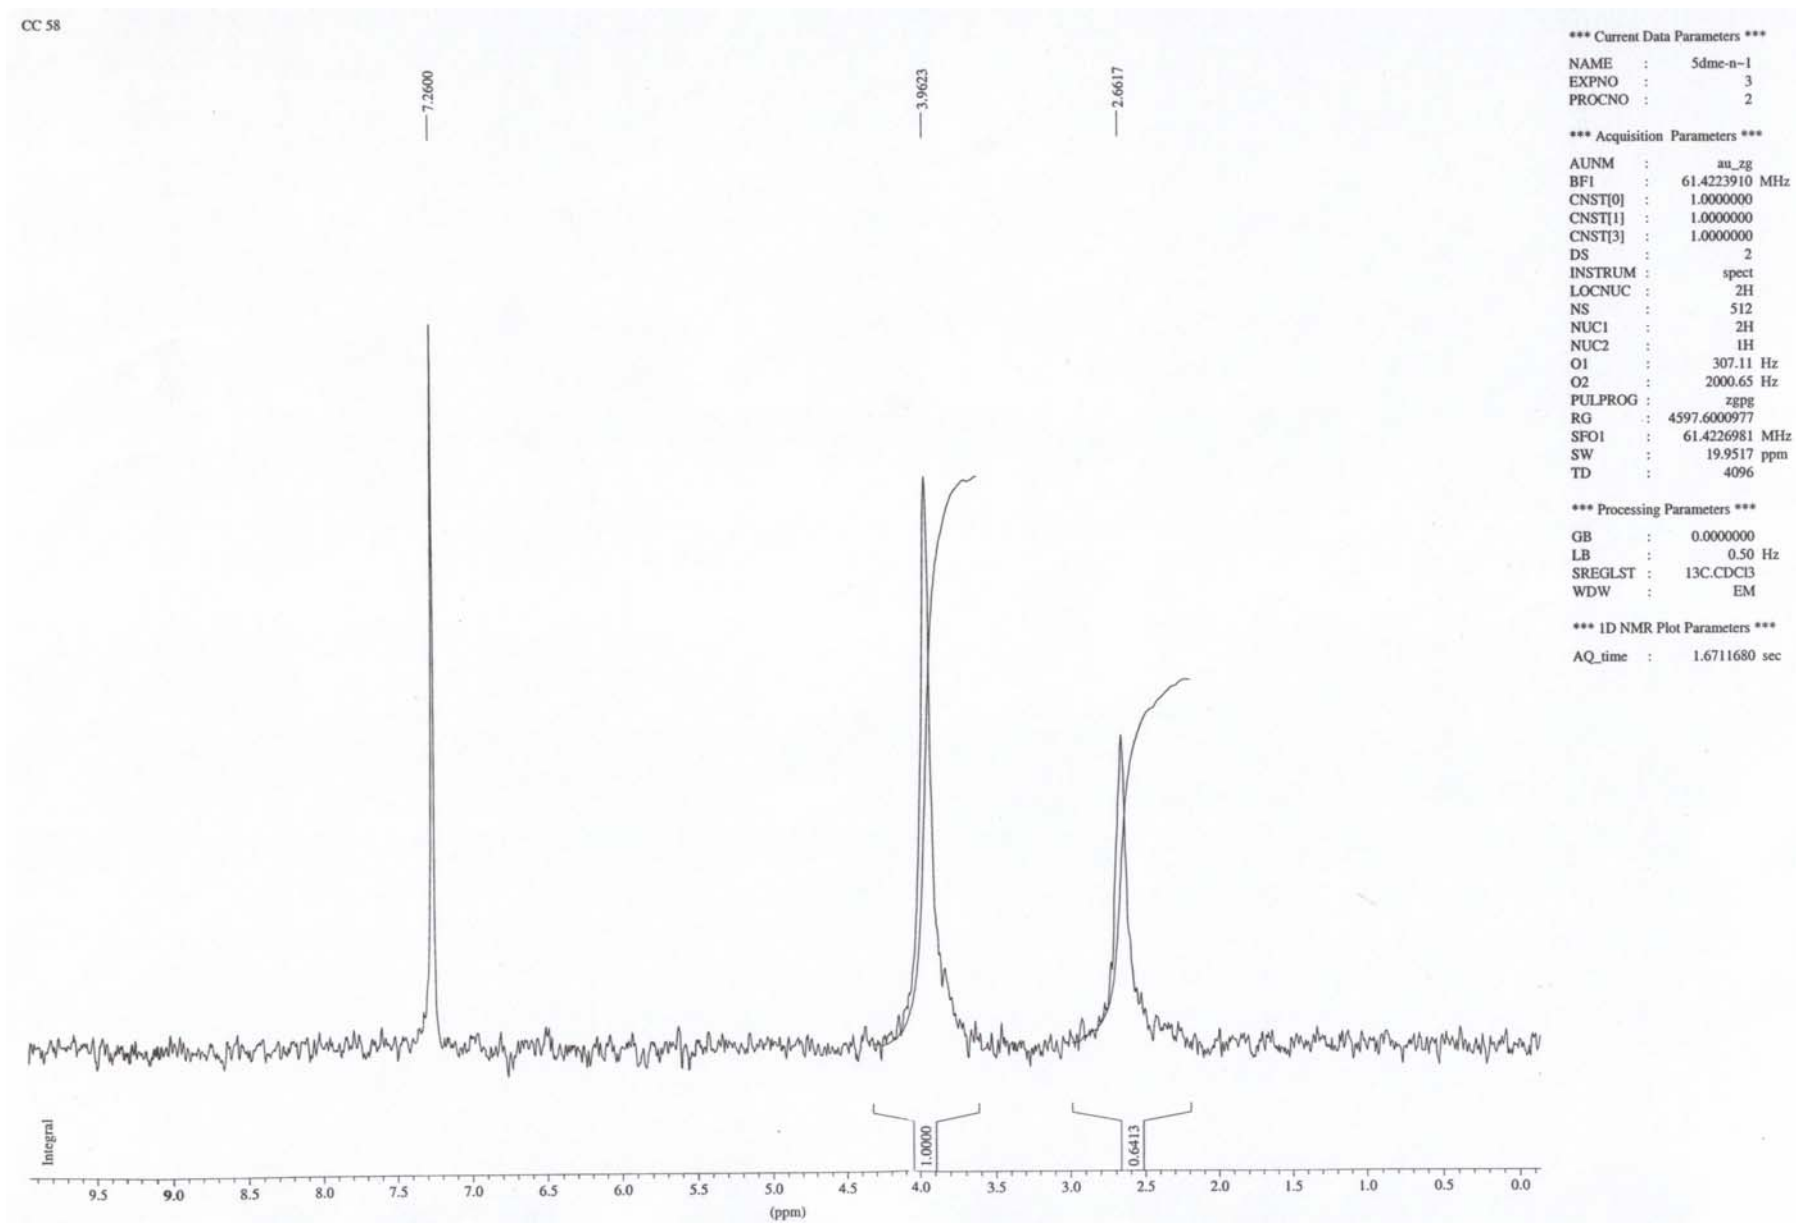

$^2\text{H}$  NMR of the mixture of **5a** and **6b** used for competition feeding.

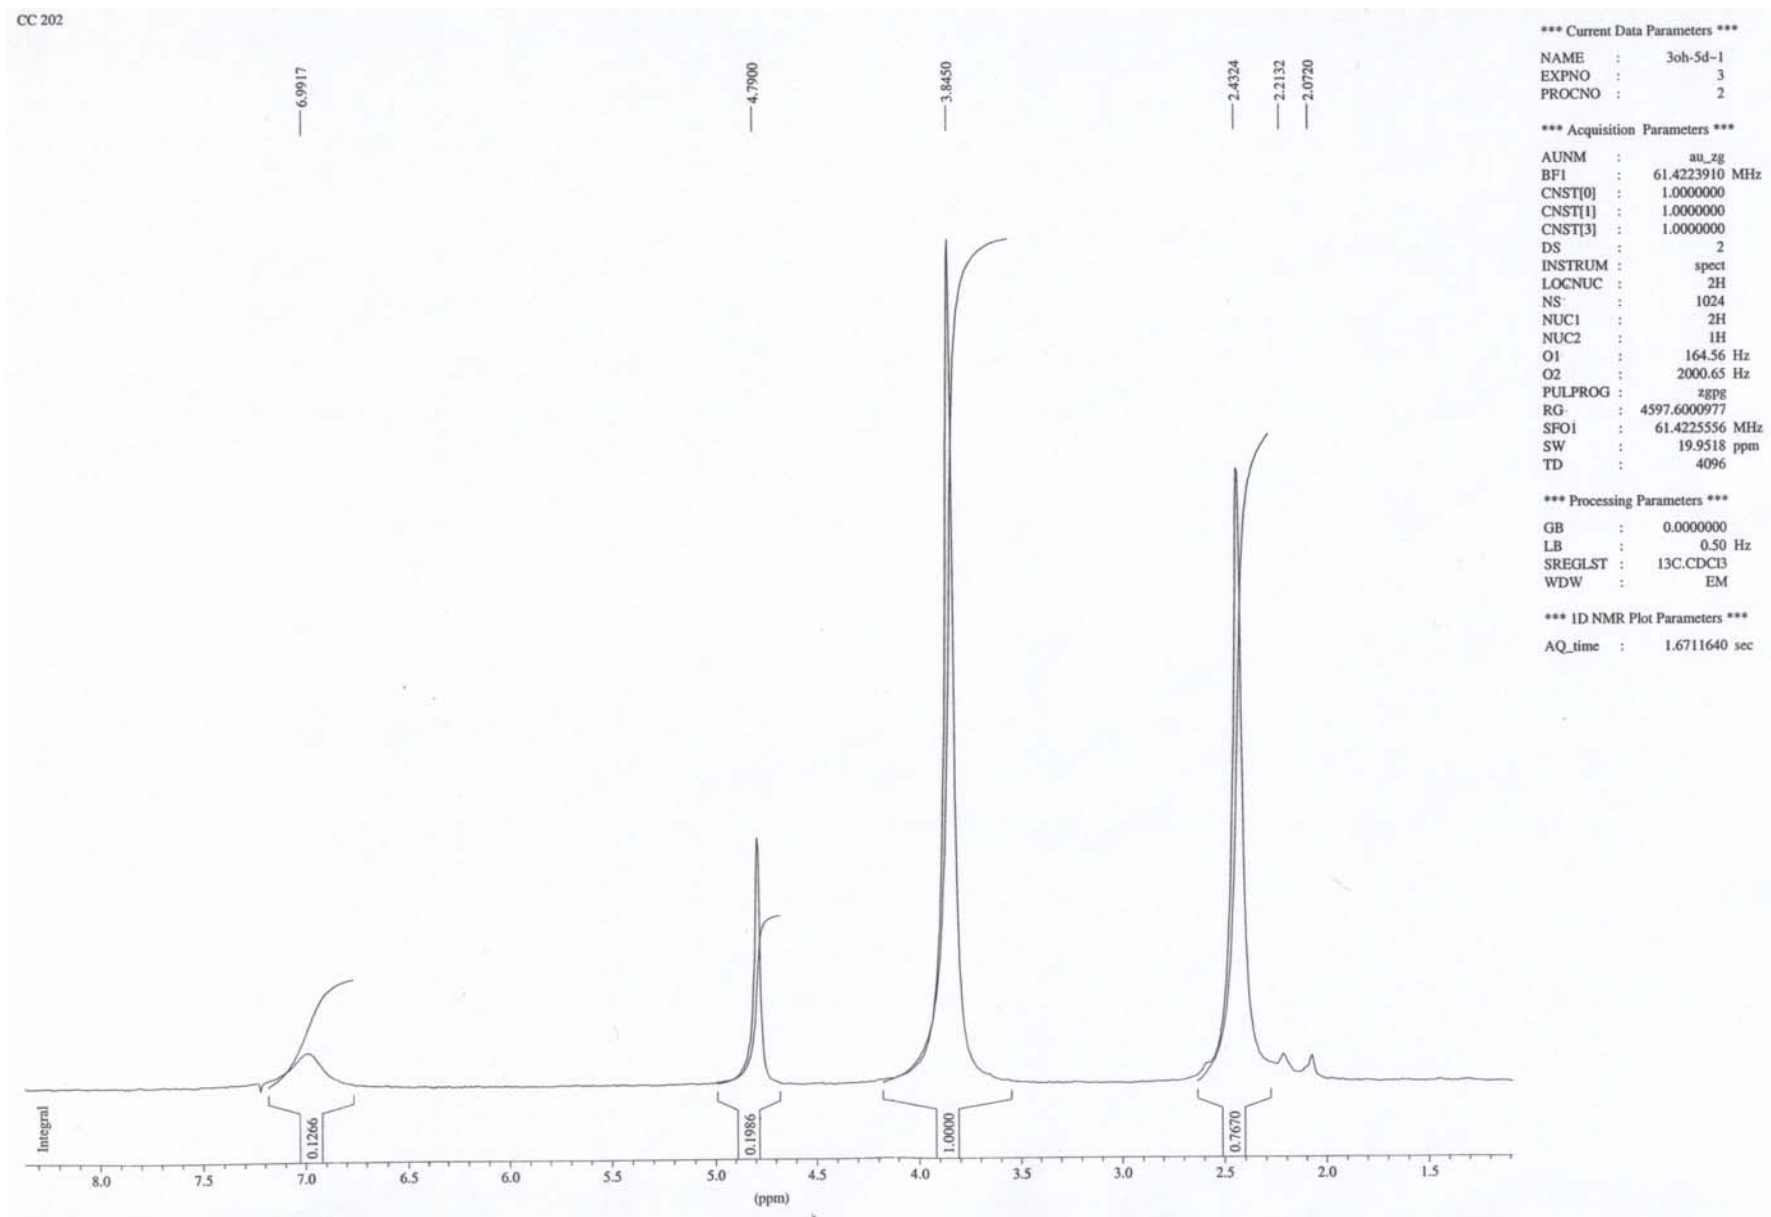

$^2\text{H}$  NMR of azinomycin B after feeding of **5a** and **6b**.

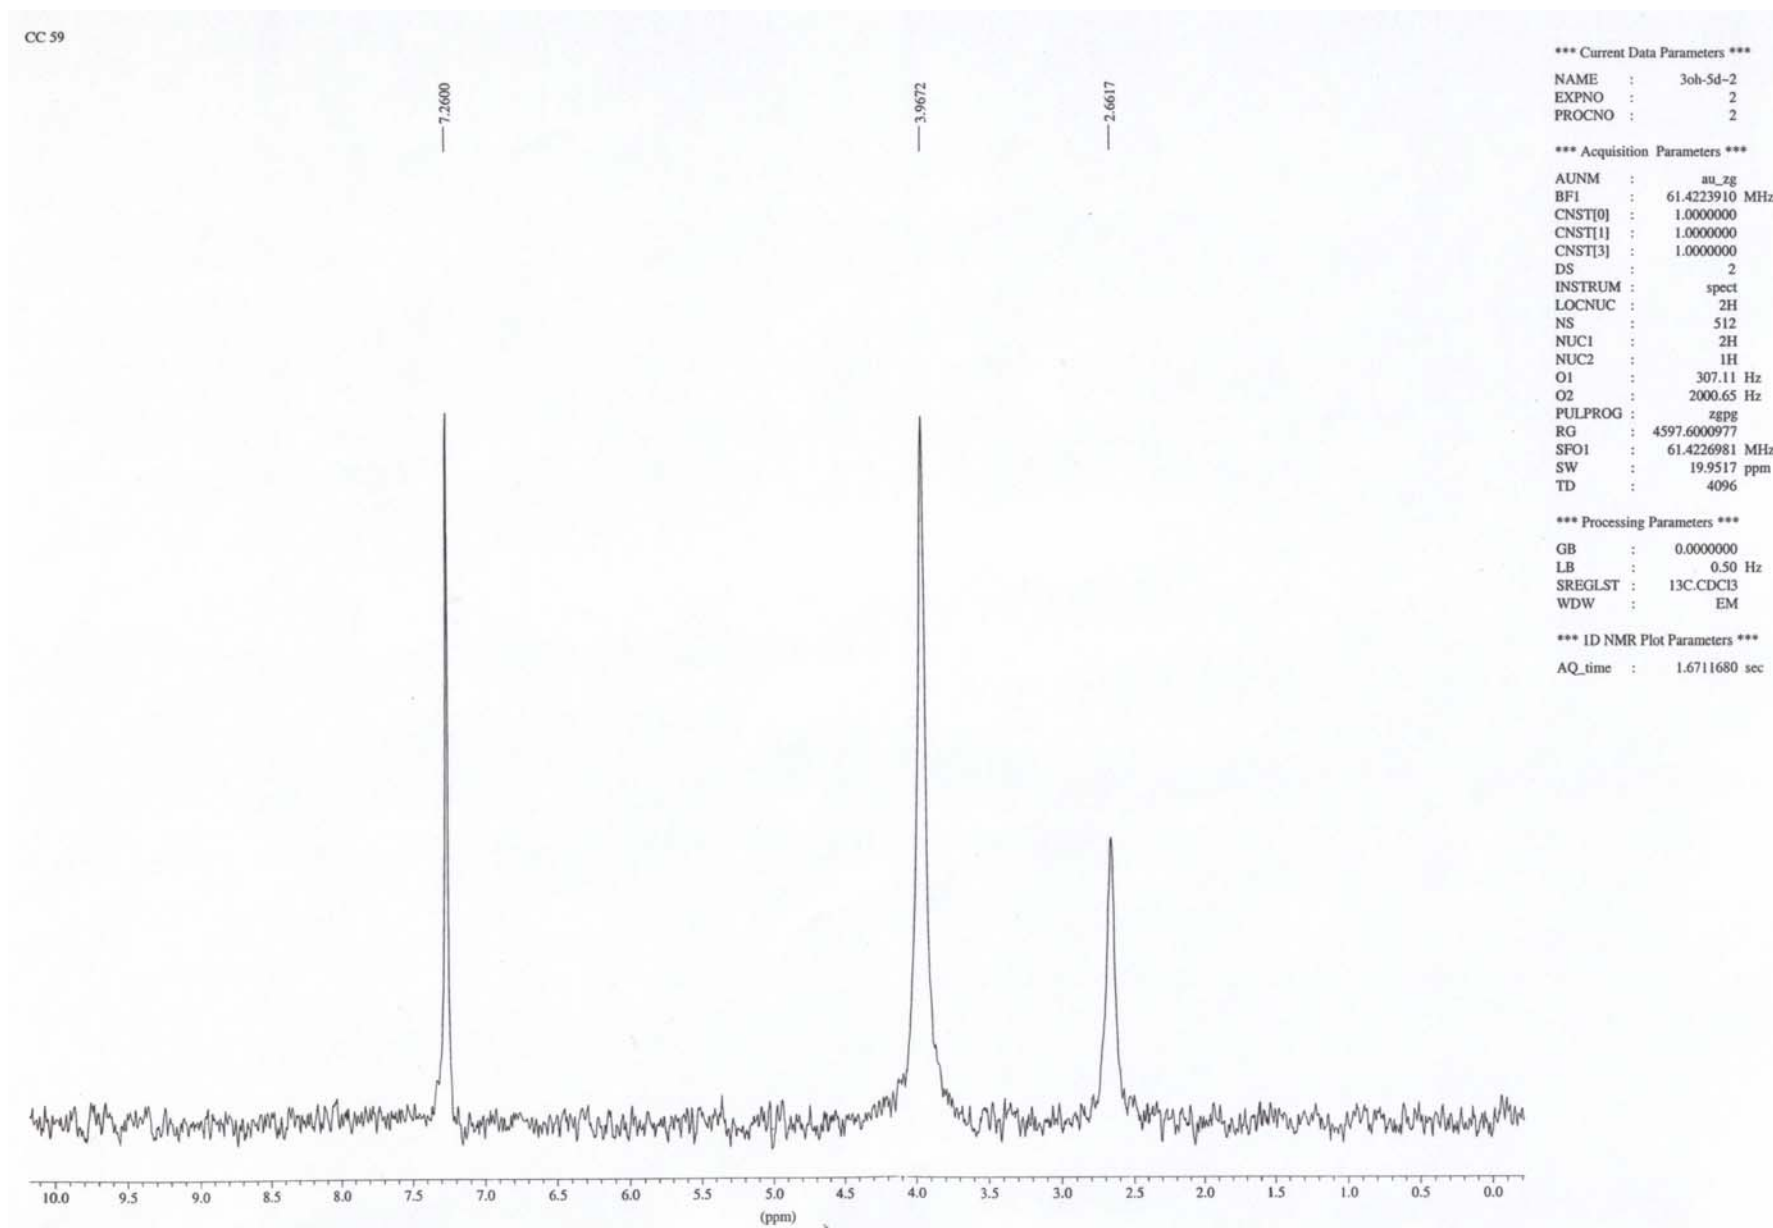

ESMS of azinomycin B after feeding of **4b**.

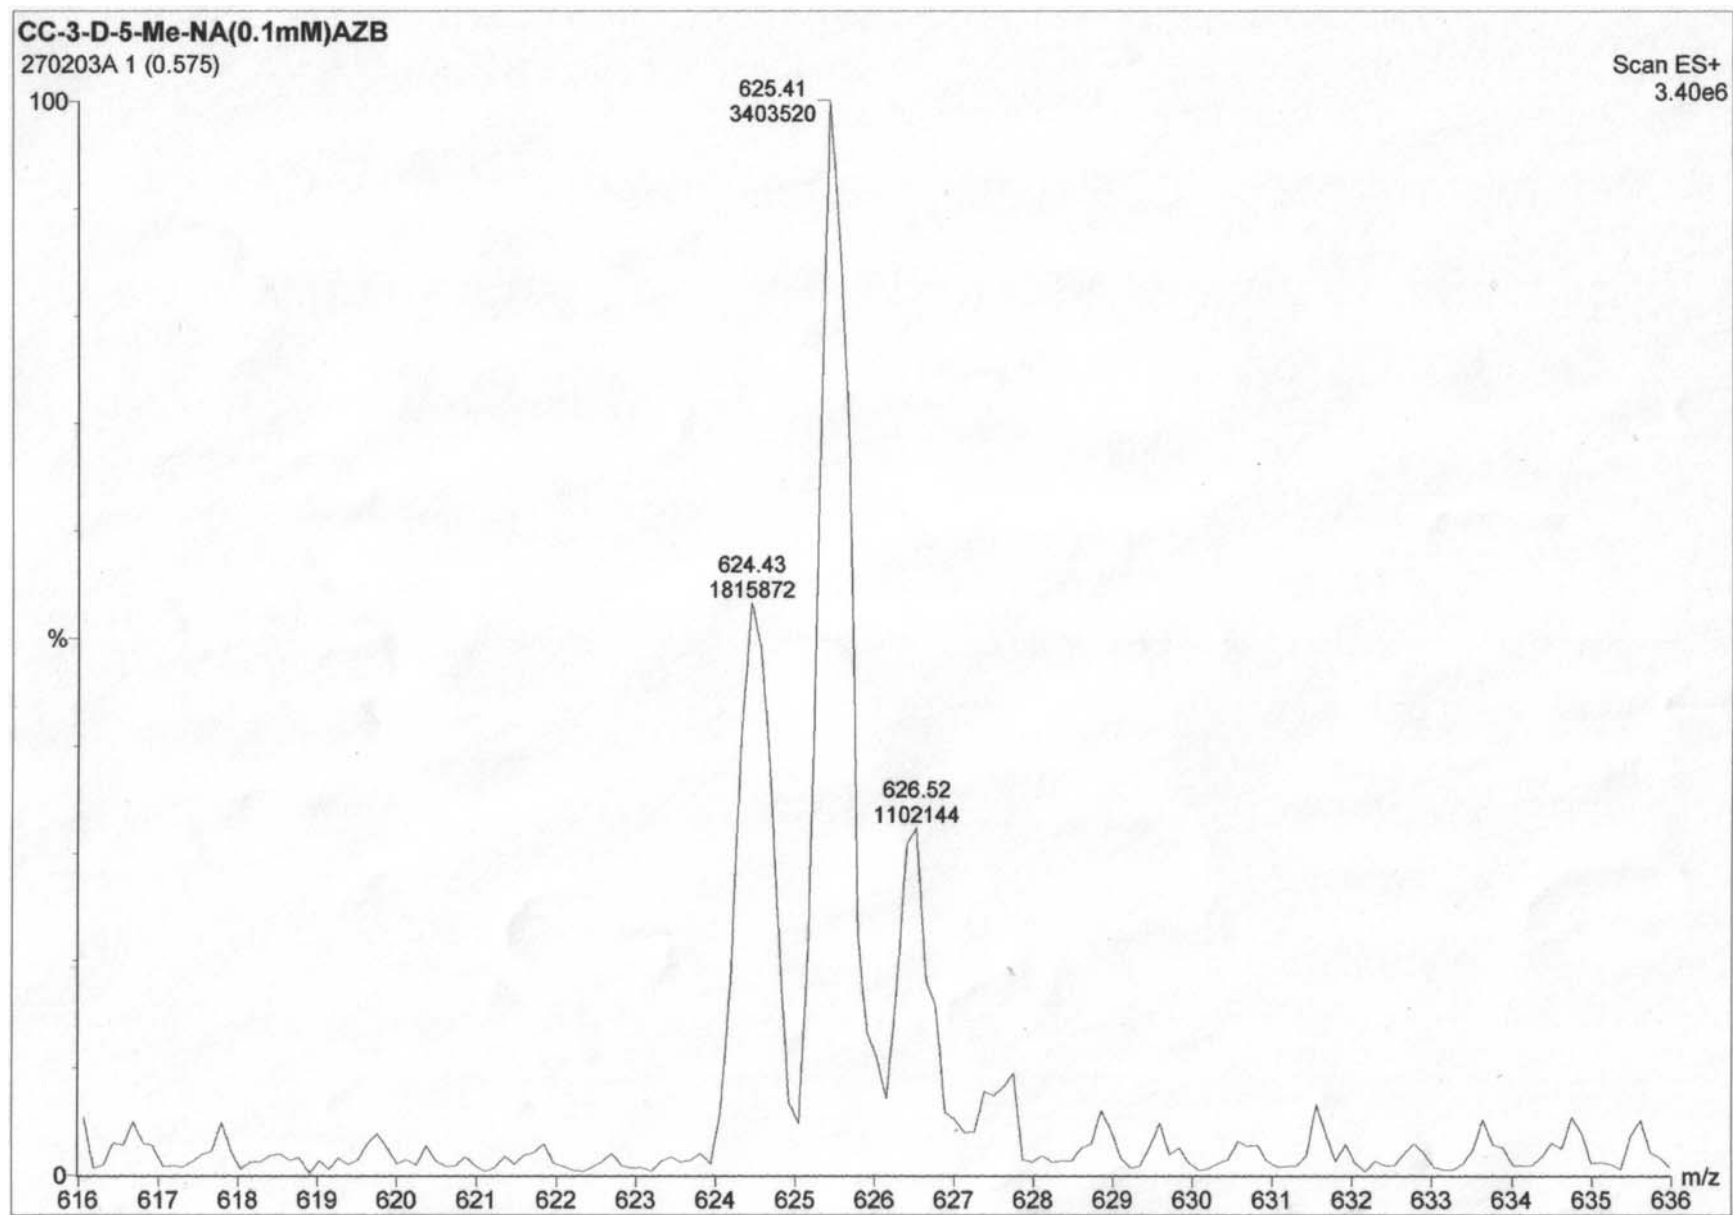

$^2\text{H}$  NMR of azinomycin B after feeding of **4b**.

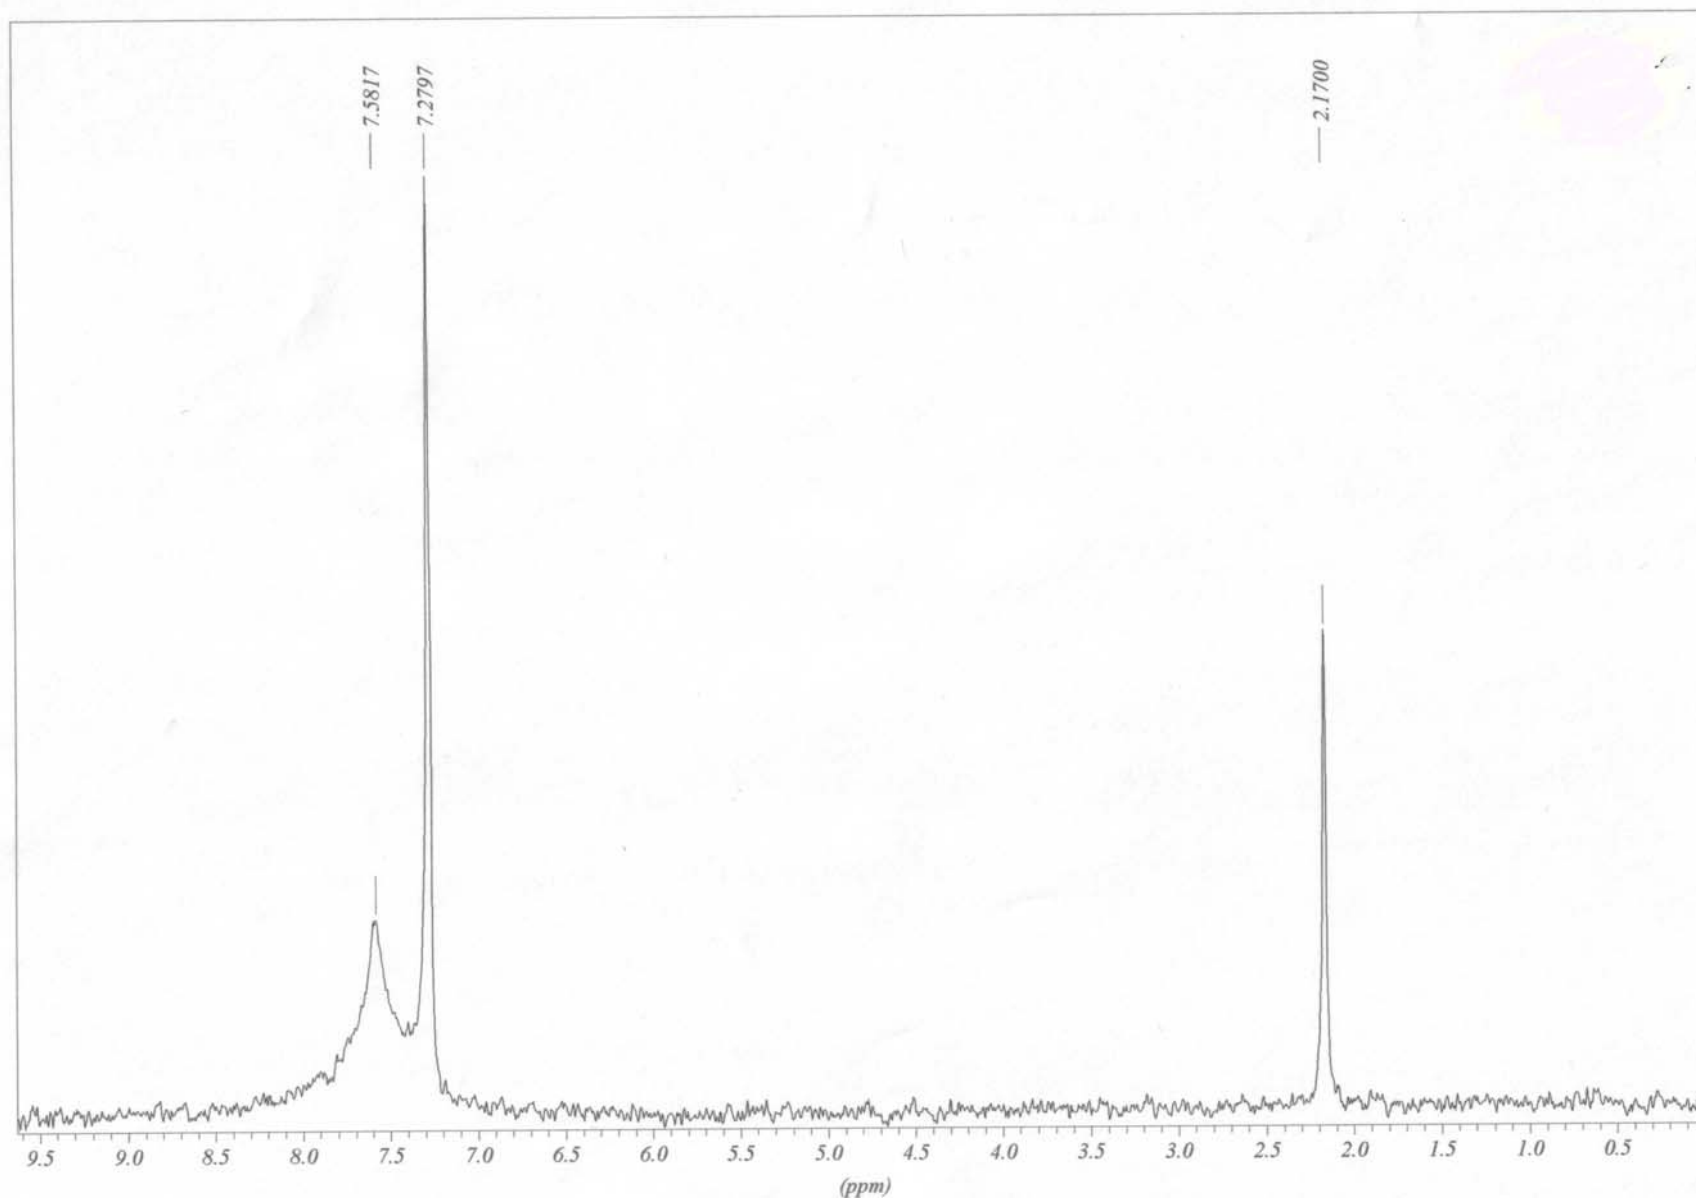

<sup>1</sup>H NMR of azinomycin B after feeding of **4b**.

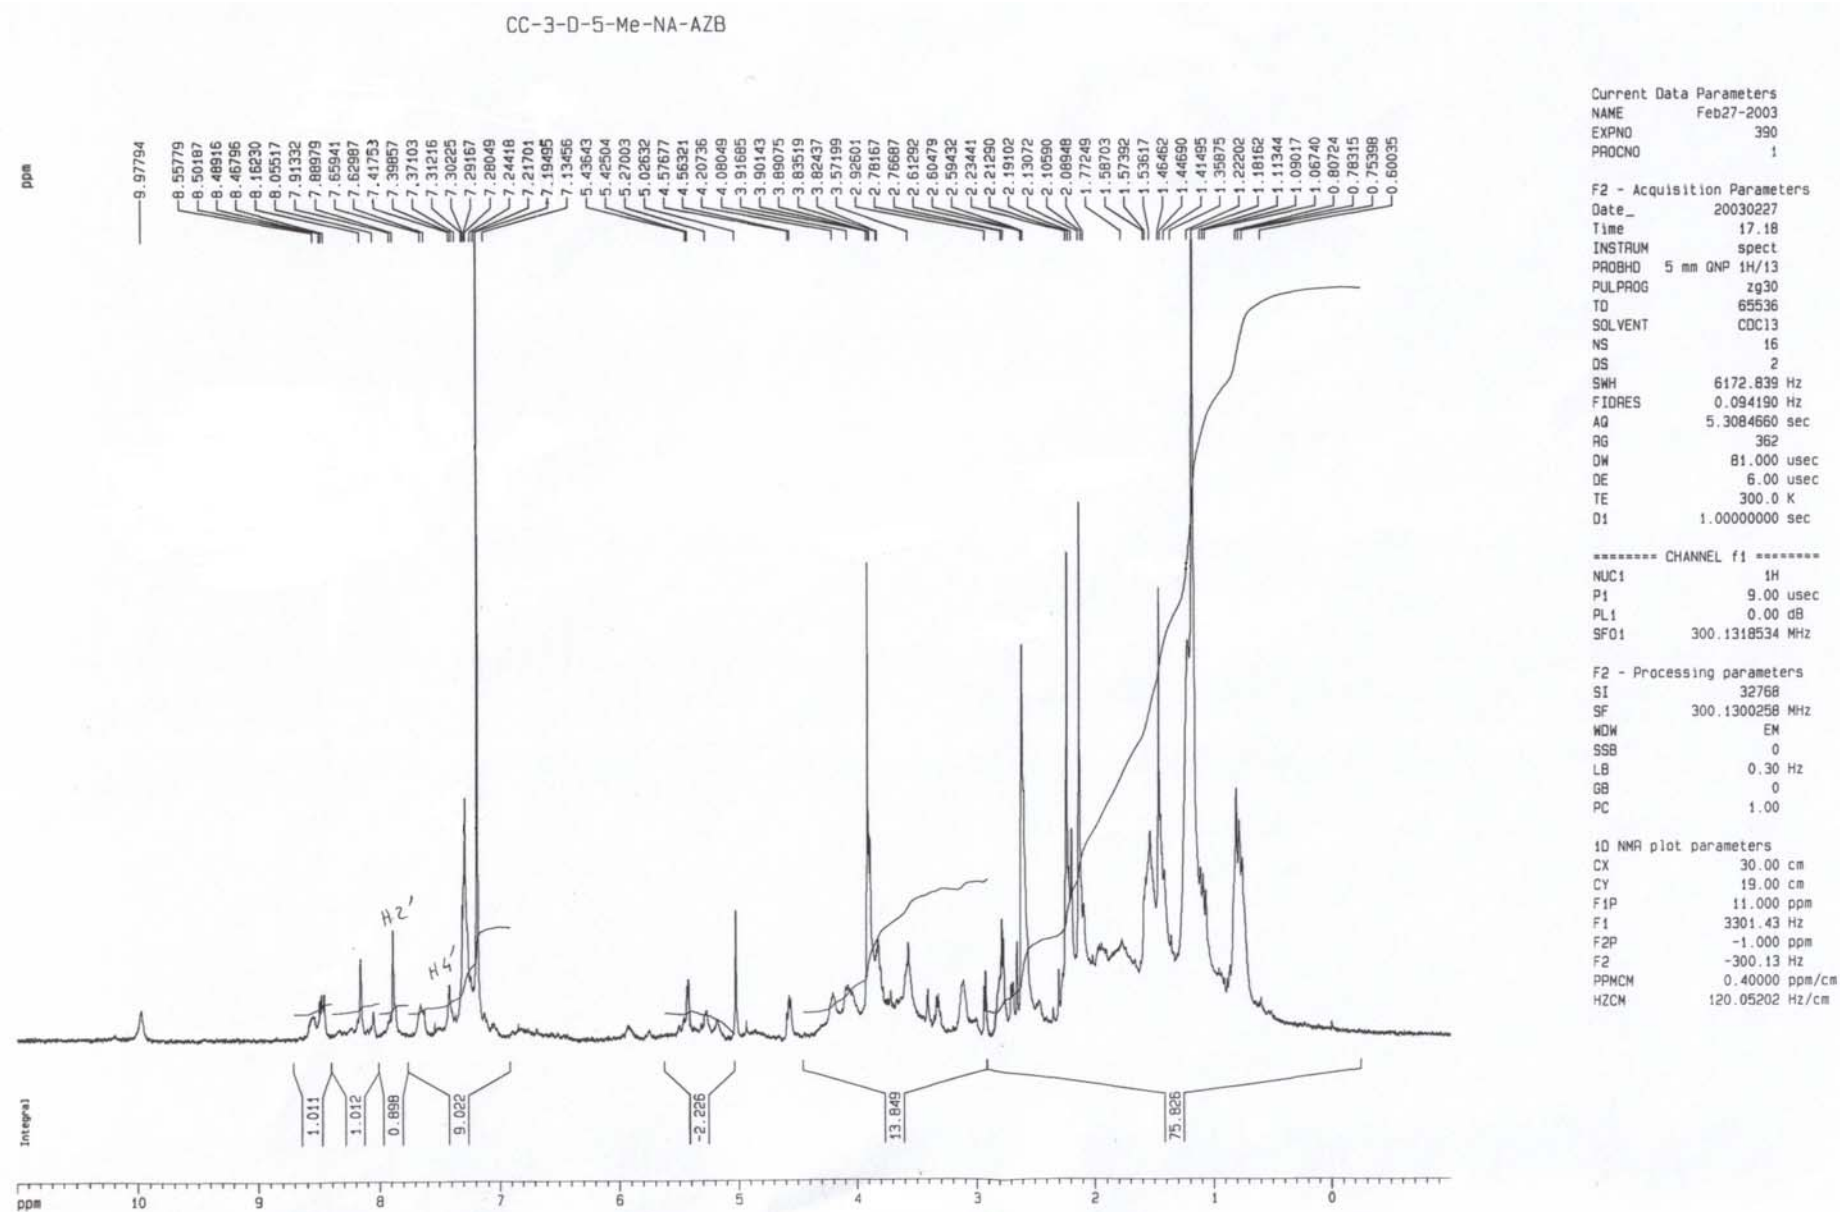

<sup>1</sup>H NMR spectrum of **6a**.

DL ZU3

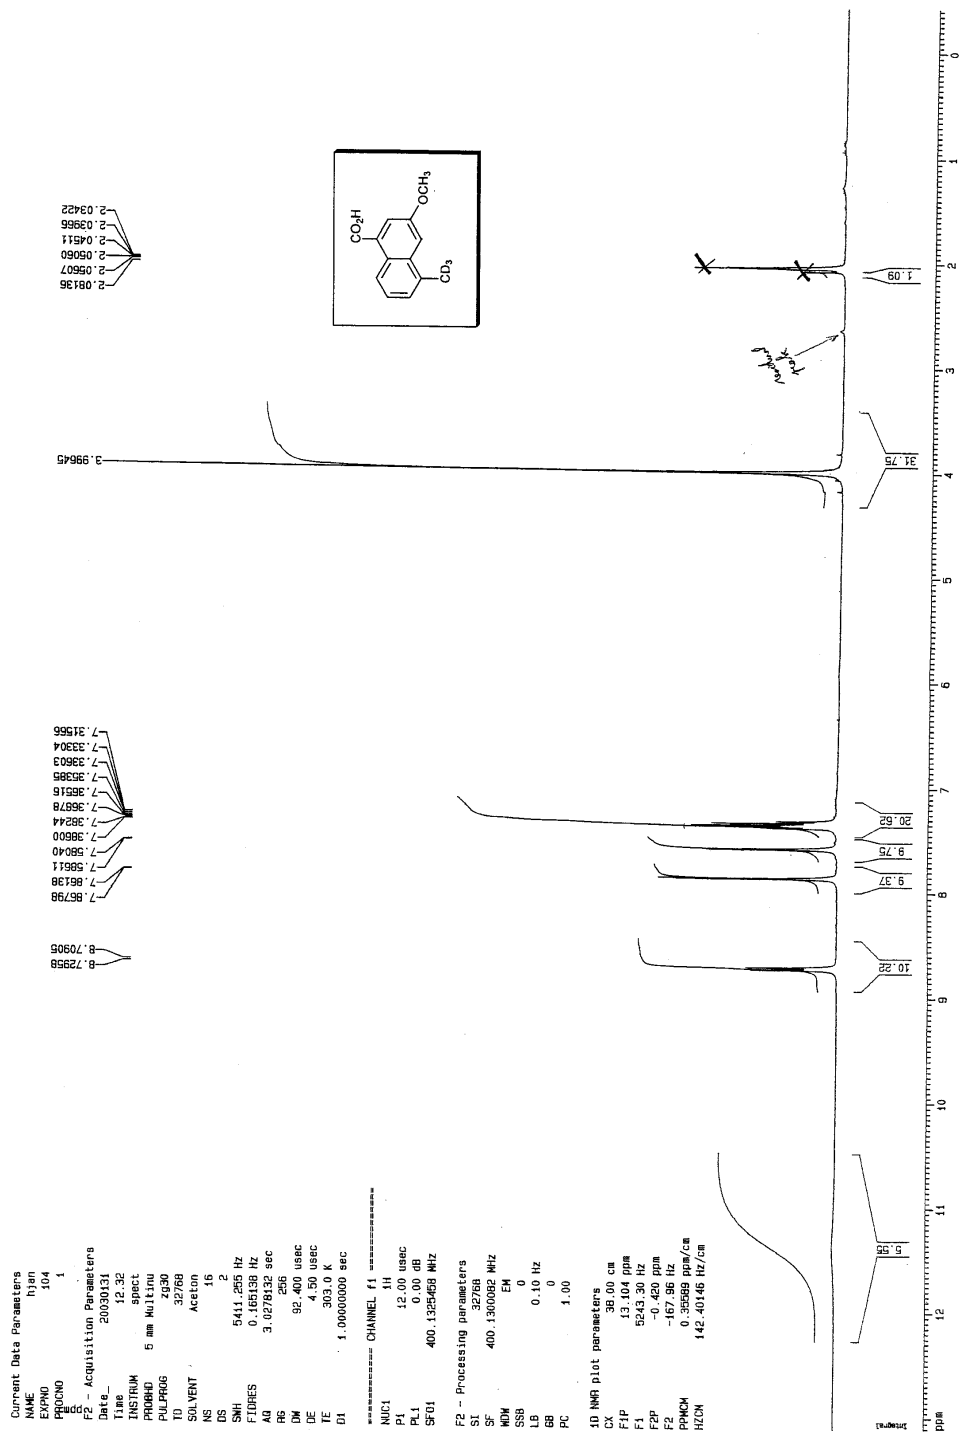





<sup>2</sup>H NMR spectrum of **6a**.

CL 203

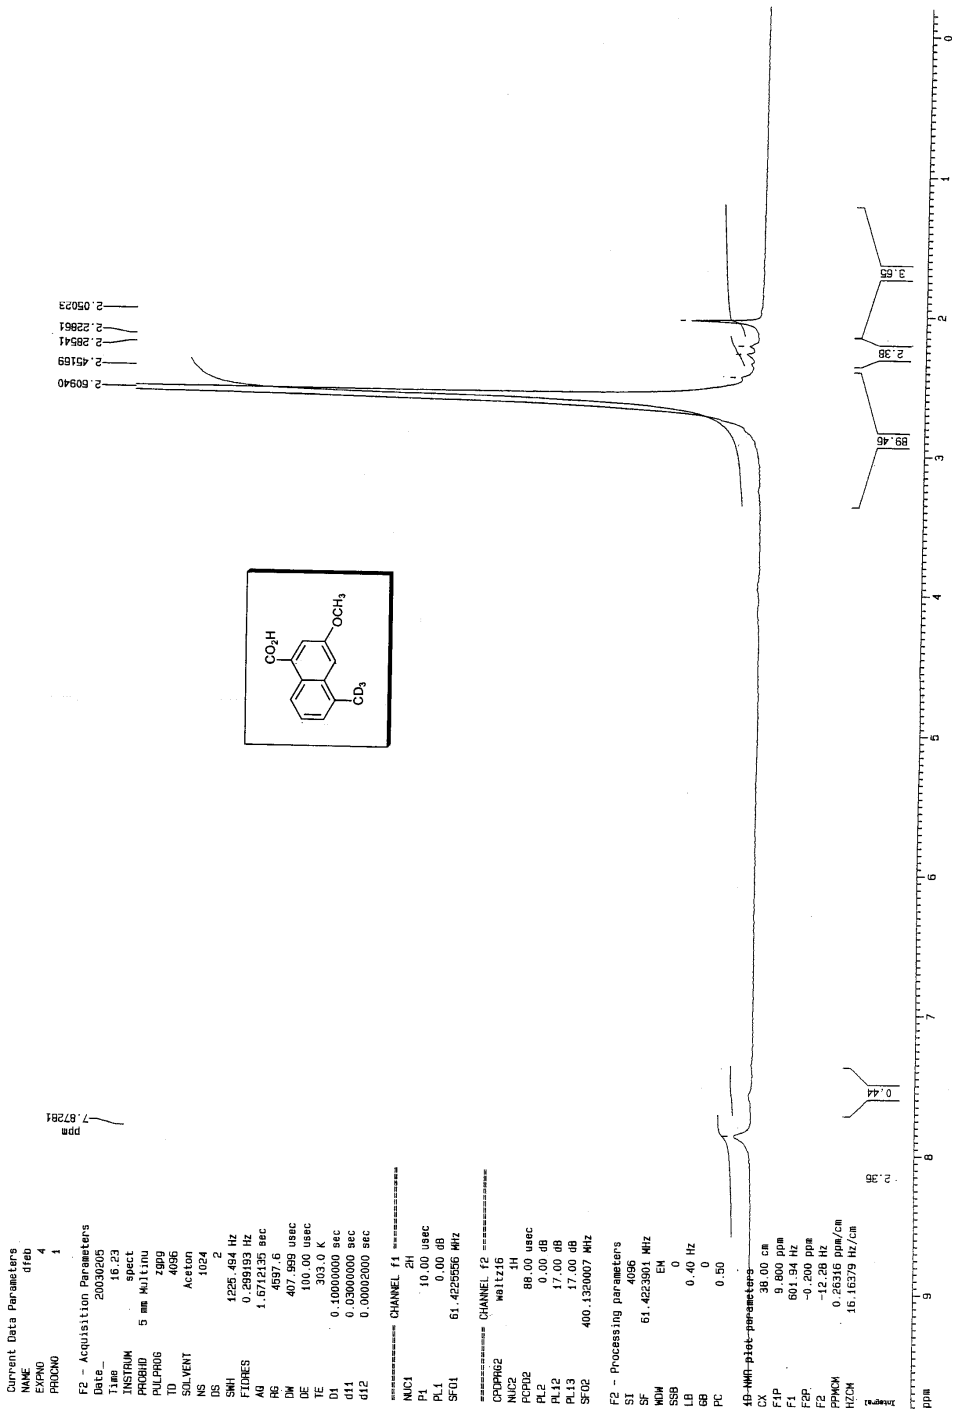

ESMS spectrum of **6a**.

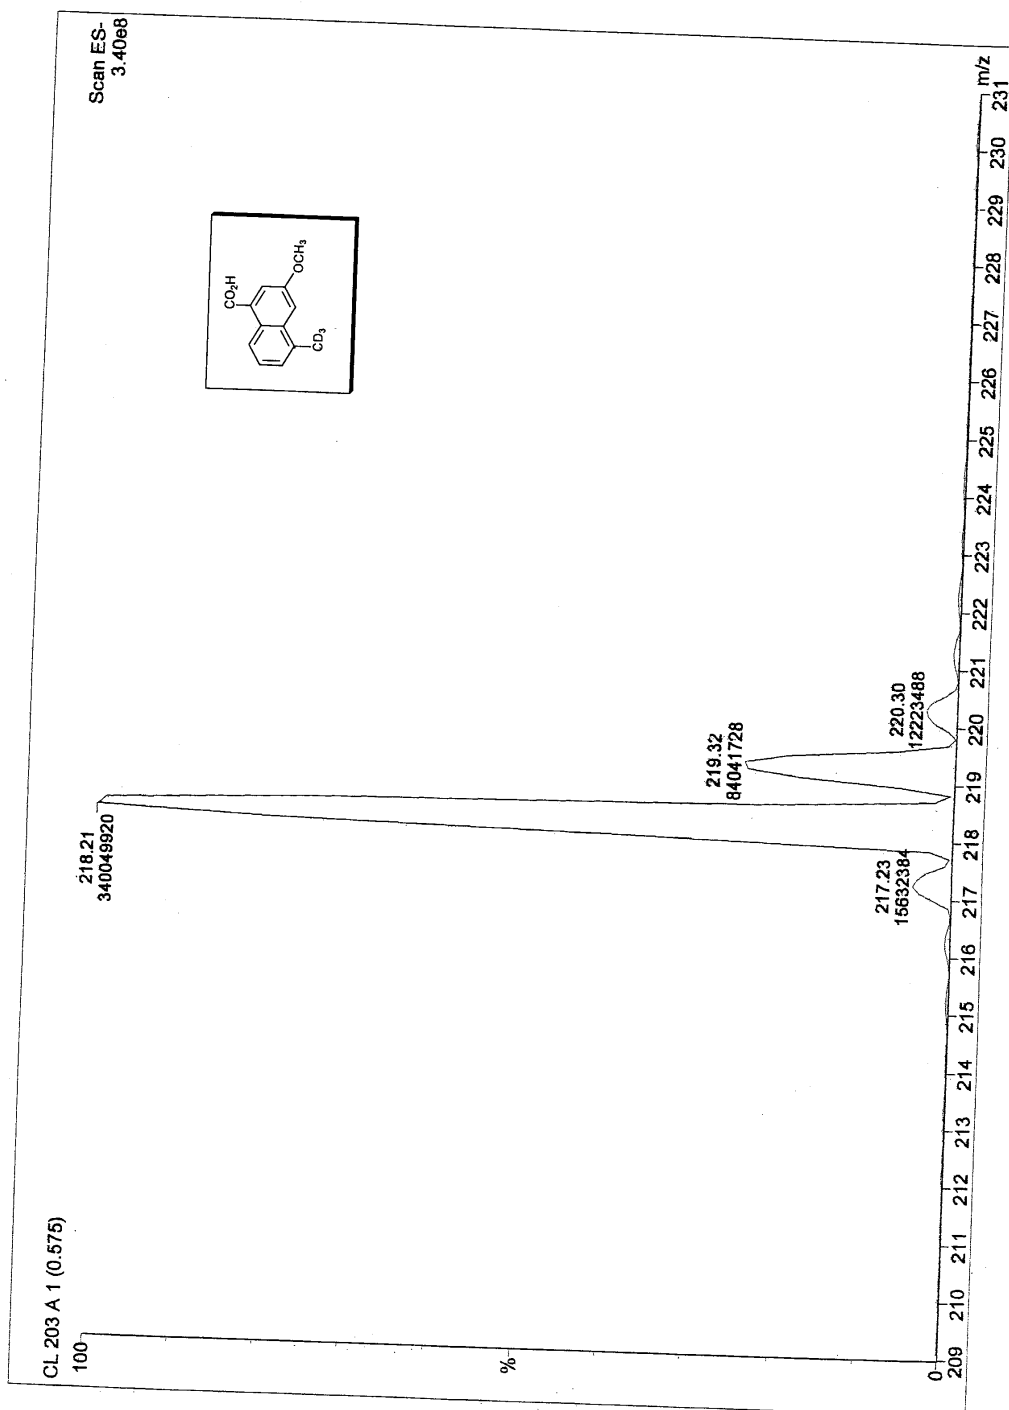

<sup>1</sup>H NMR spectrum of **5a**.

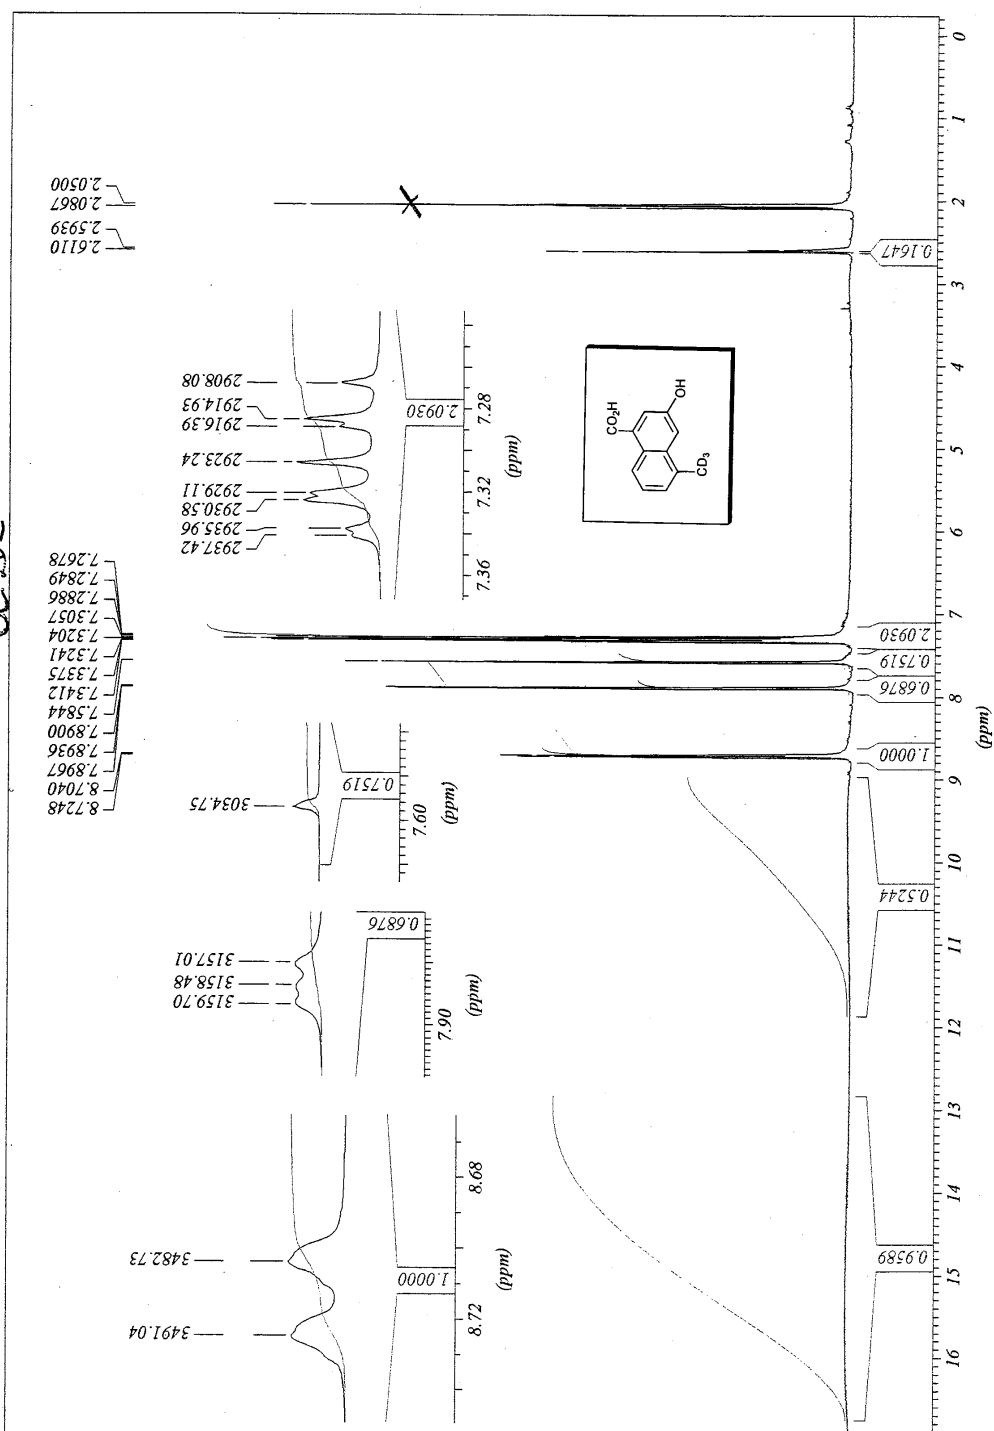

$^2\text{H}$  NMR spectrum of **5a**.

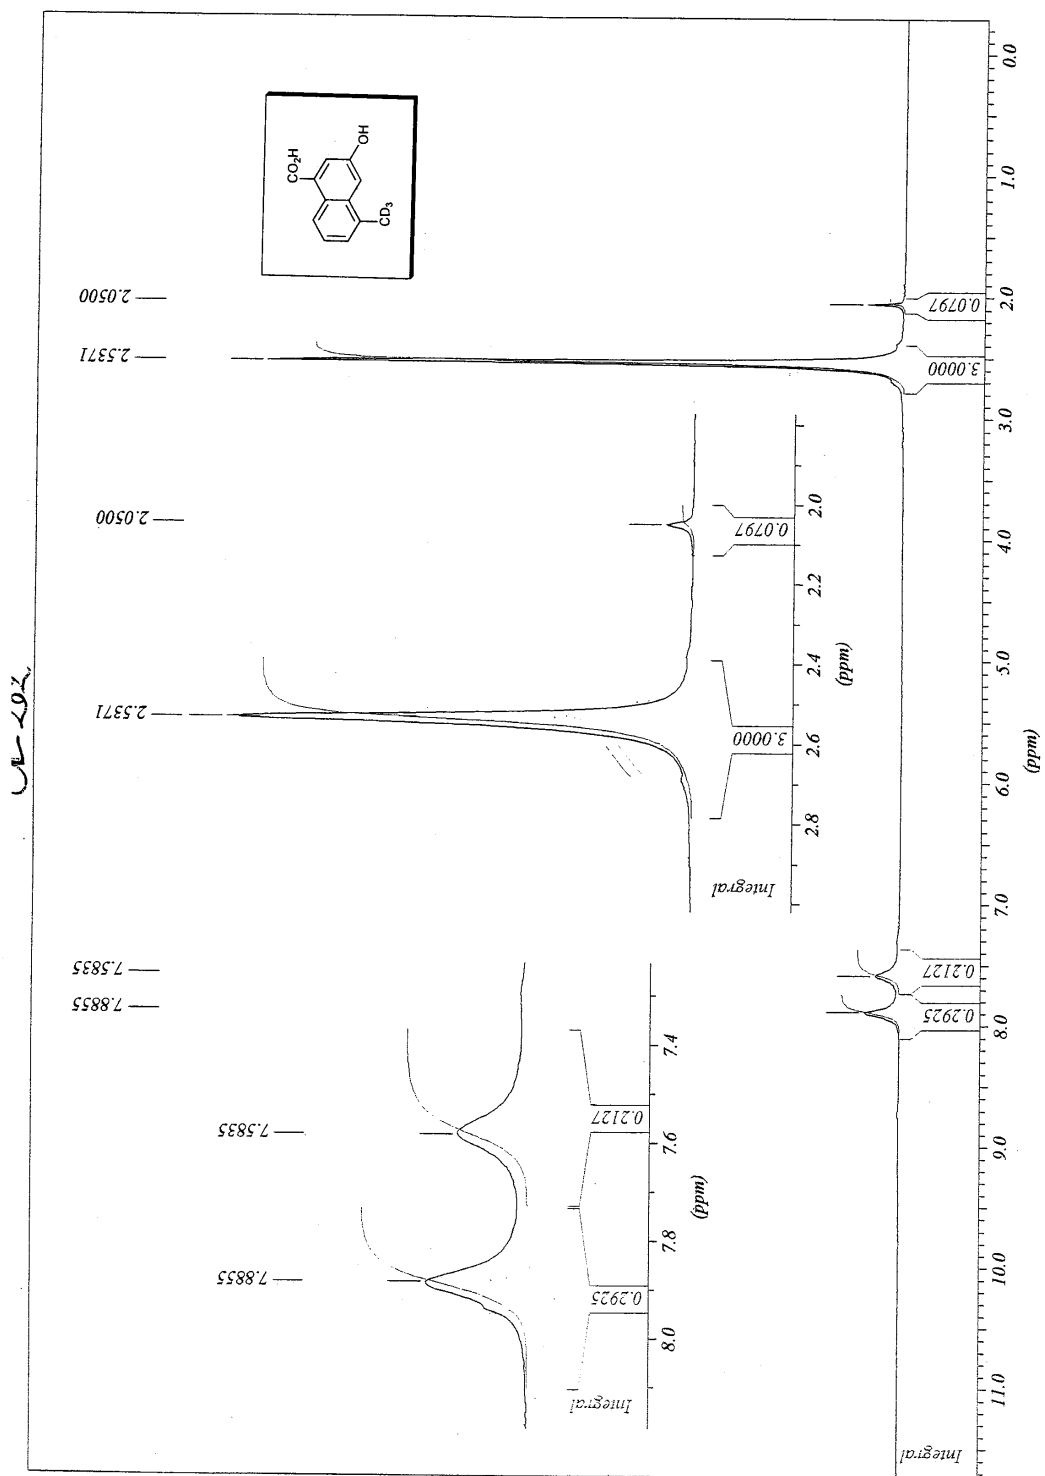

ESMS spectrum of **5a**.

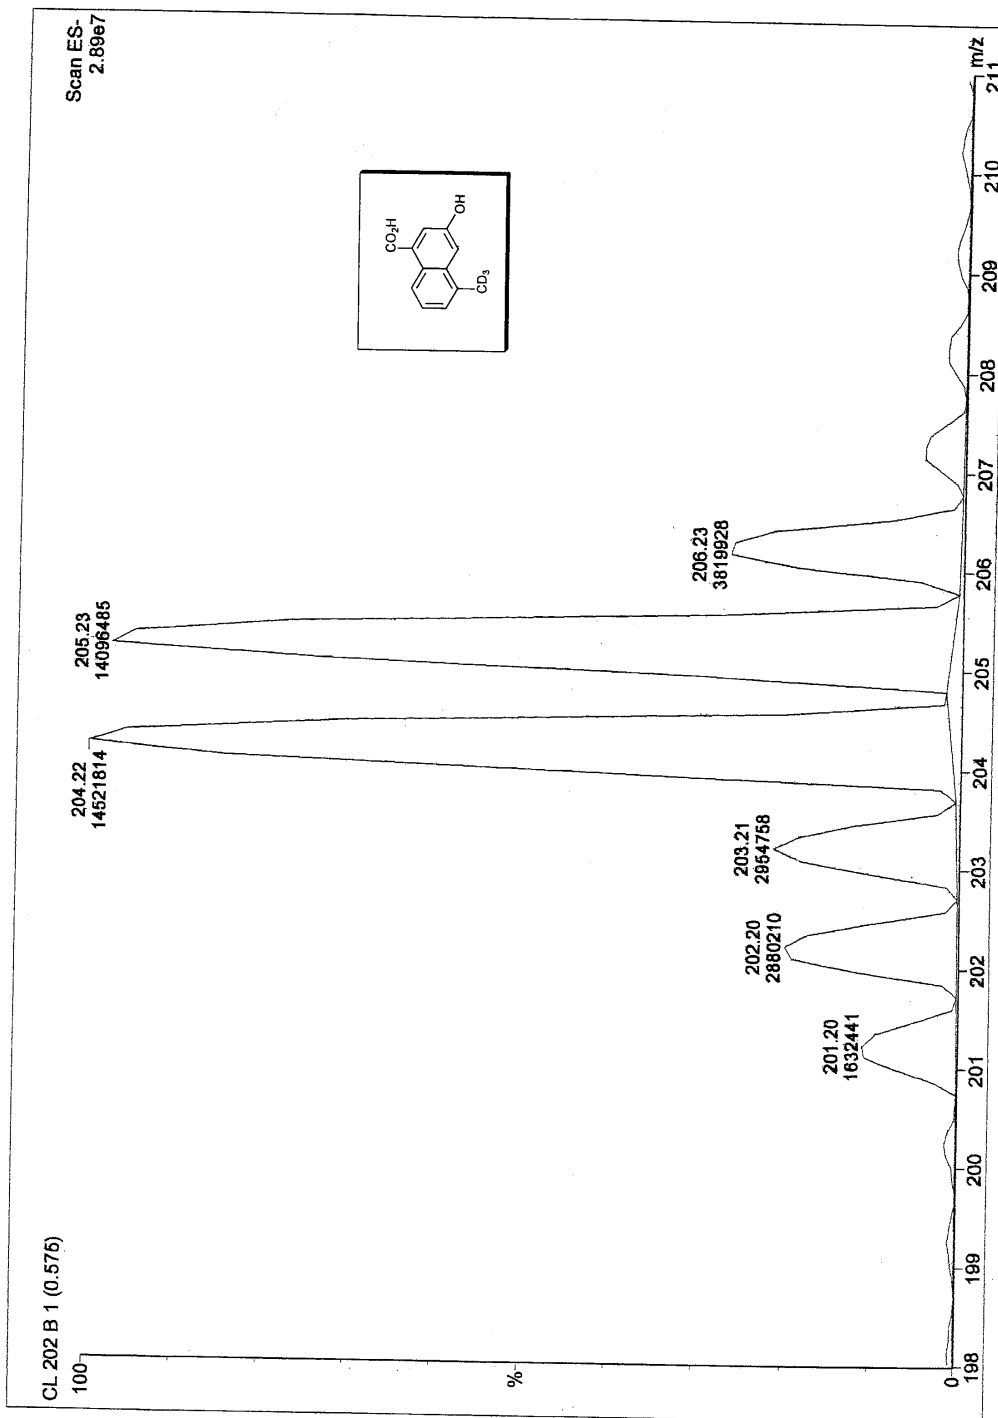

<sup>1</sup>H NMR spectrum of **4a**.

CL 197

```

Current Data Parameters
NAME      156
EXPNO     1
PROCNO    1
F2 - Acquisition Parameters
Date_     20030117
Time      9.34
INSTRUM   spect
PROBHD    5 mm Multinu
PULPROG   zg30
TD         32768
SOLVENT   DMSO
NS         16
DS         2
SWH        4789.272 Hz
FIDRES     0.164557 Hz
AQ         3.4210281 sec
RG         481
DE         104.400 usec
TE         303.0 K
D1         1.00000000 sec
===== CHANNEL f1 =====
NUC1       1H
P1         12.00 usec
PL1        0.00 dB
SFO1       400.1320007 MHz
F2 - Processing parameters
SI         32768
SF         400.1300022 MHz
WDW        EM
SSB        0
LB         0.10 Hz
GB         0
PC         1.00
10 MHz plot parameters
CX         36.00 cm
F1P        10.564 ppm
F1         4387.13 Hz
F2P        -1.005 ppm
F2         -402.14 Hz
PPMCH      0.31489 ppm/cm
HZDM       126.03347 Hz/cm.
    
```

8.67623  
8.67446  
8.5460  
8.2483  
8.2256  
8.22371  
8.22150  
8.11207  
8.10823  
8.09410  
8.09124  
7.8983  
7.4782  
7.4599  
7.47615  
7.4719  
7.3988

3.32893  
2.63044  
2.4987  
2.48541  
2.48222

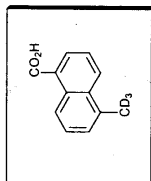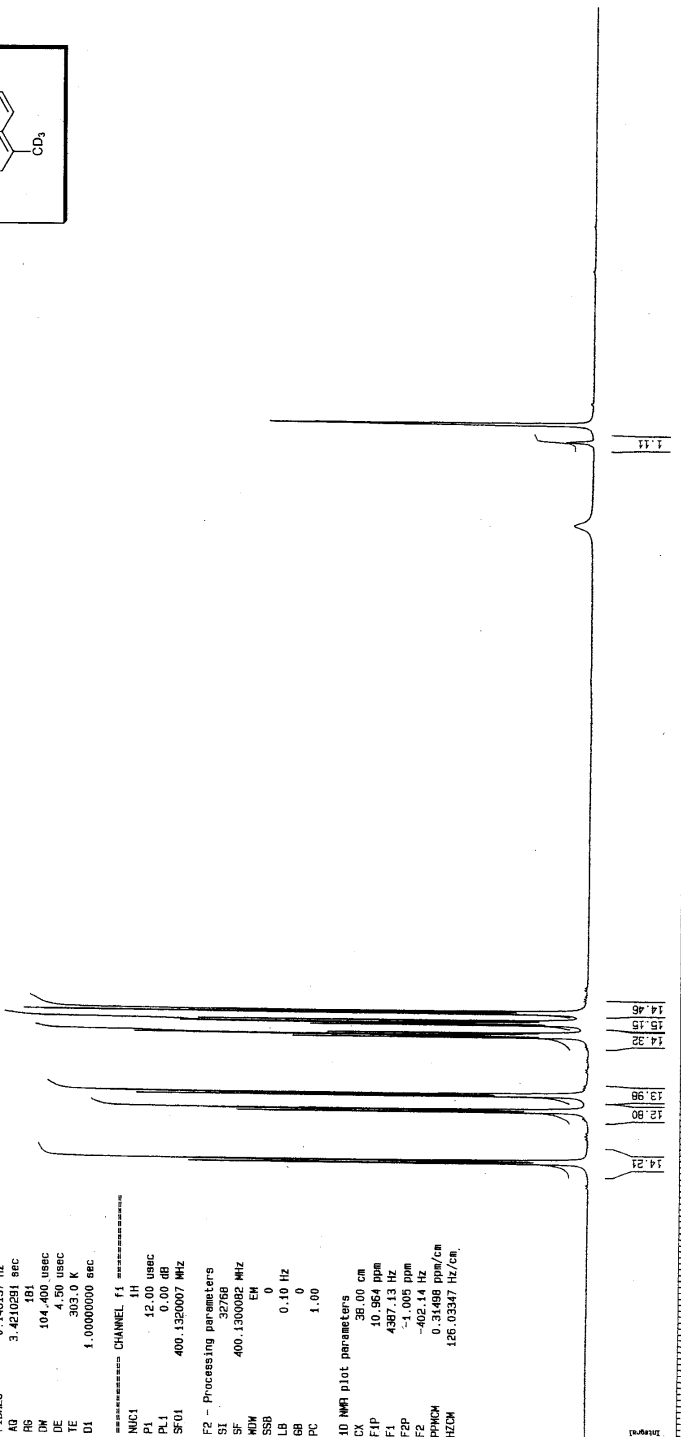

<sup>2</sup>H NMR spectrum of 4a.

CL 197

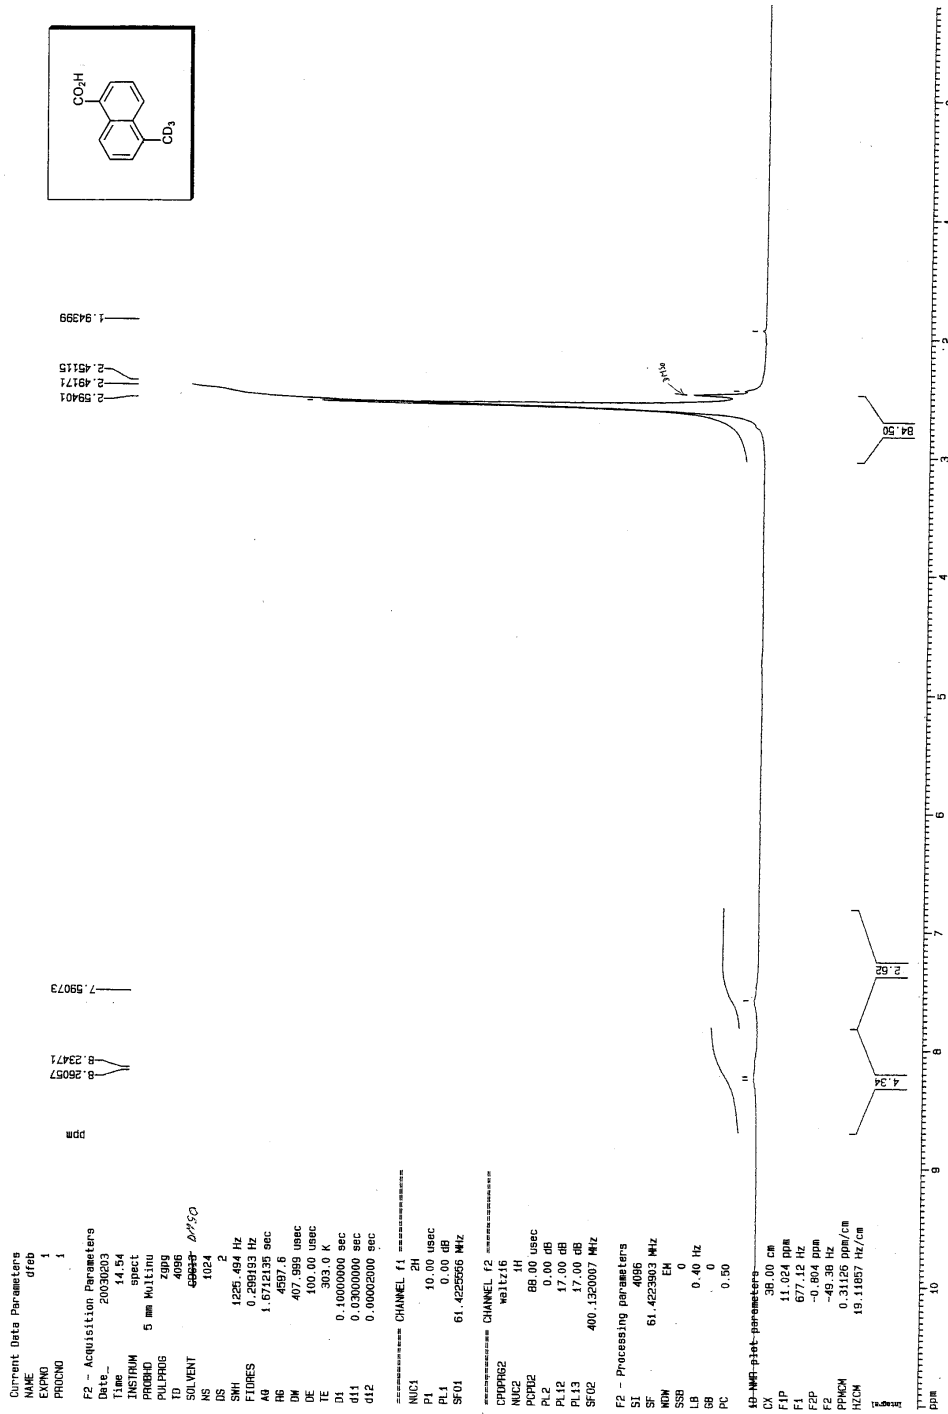

ESMS spectrum of **4a**.

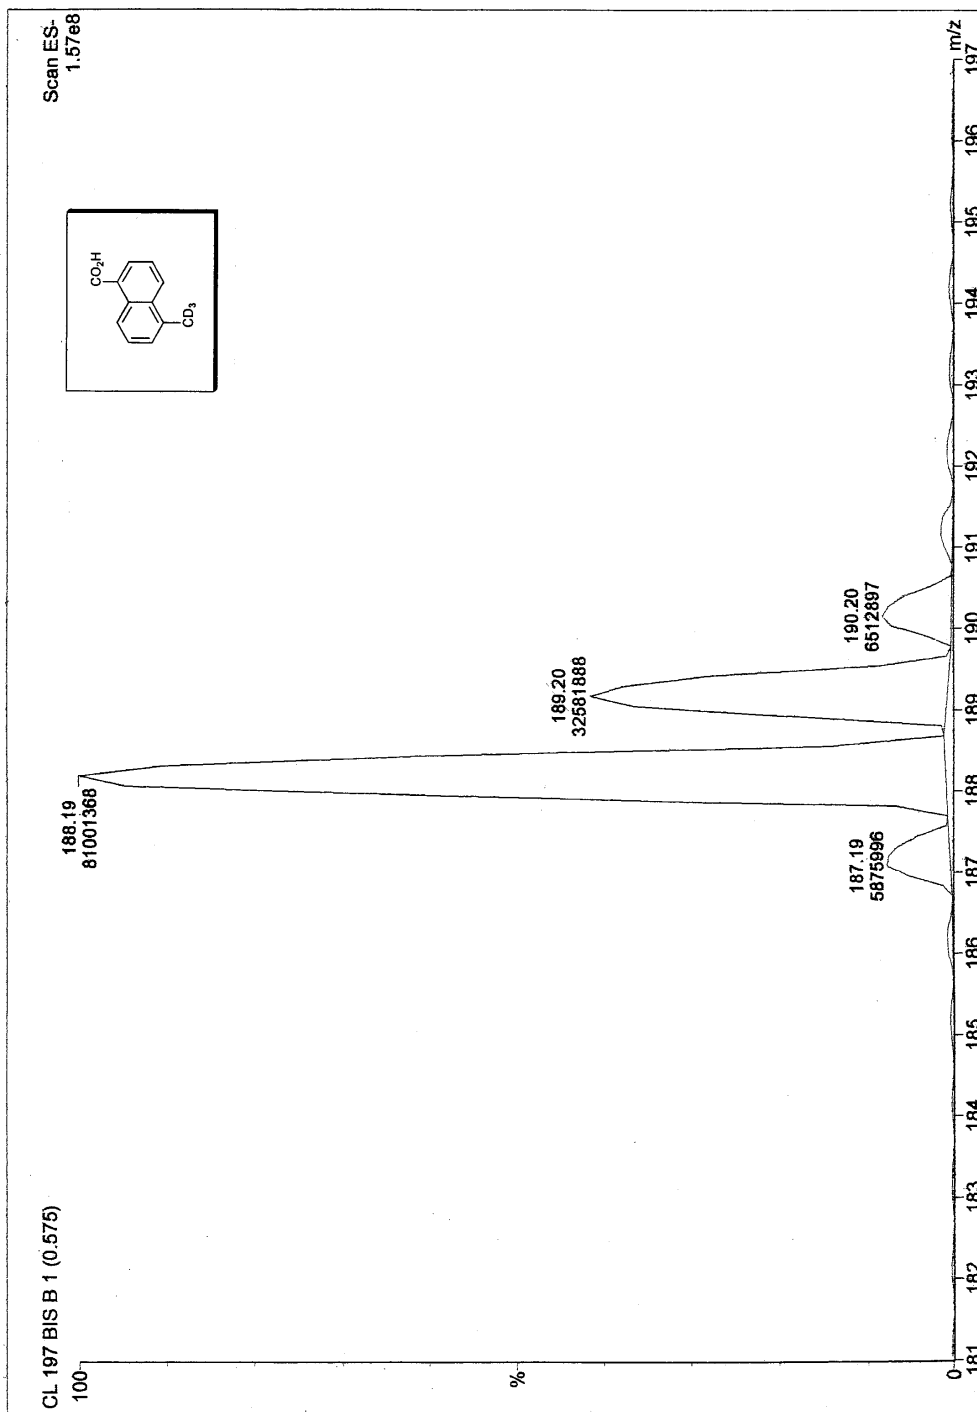



<sup>1</sup>H NMR spectrum of **6b**.

CL 237

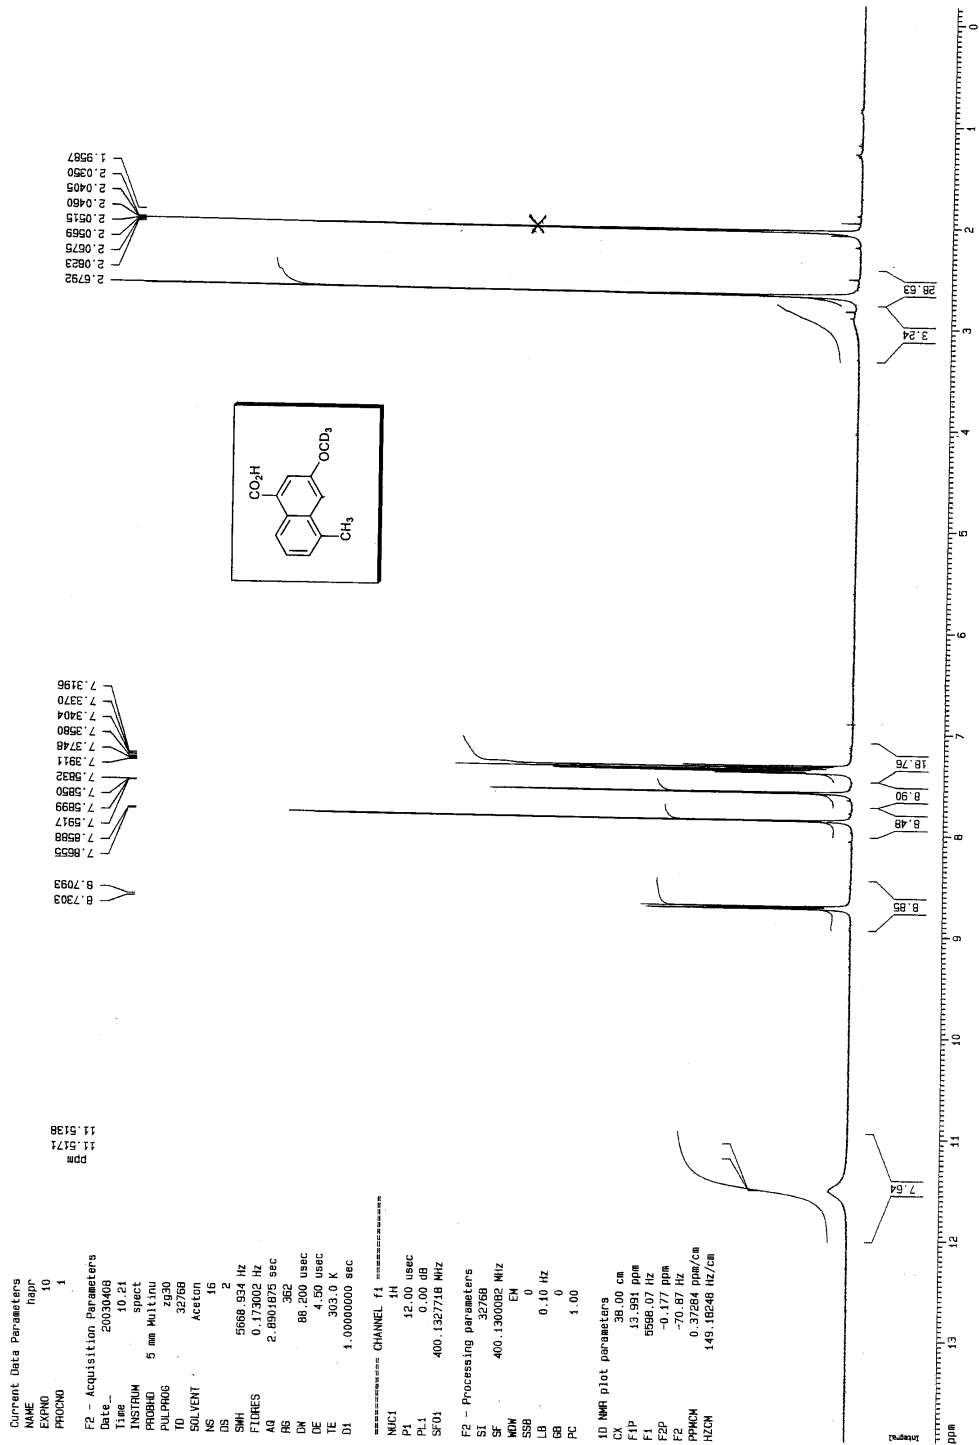

<sup>2</sup>H NMR spectrum of **6b**.

UL 437

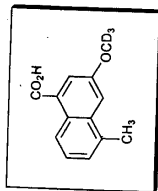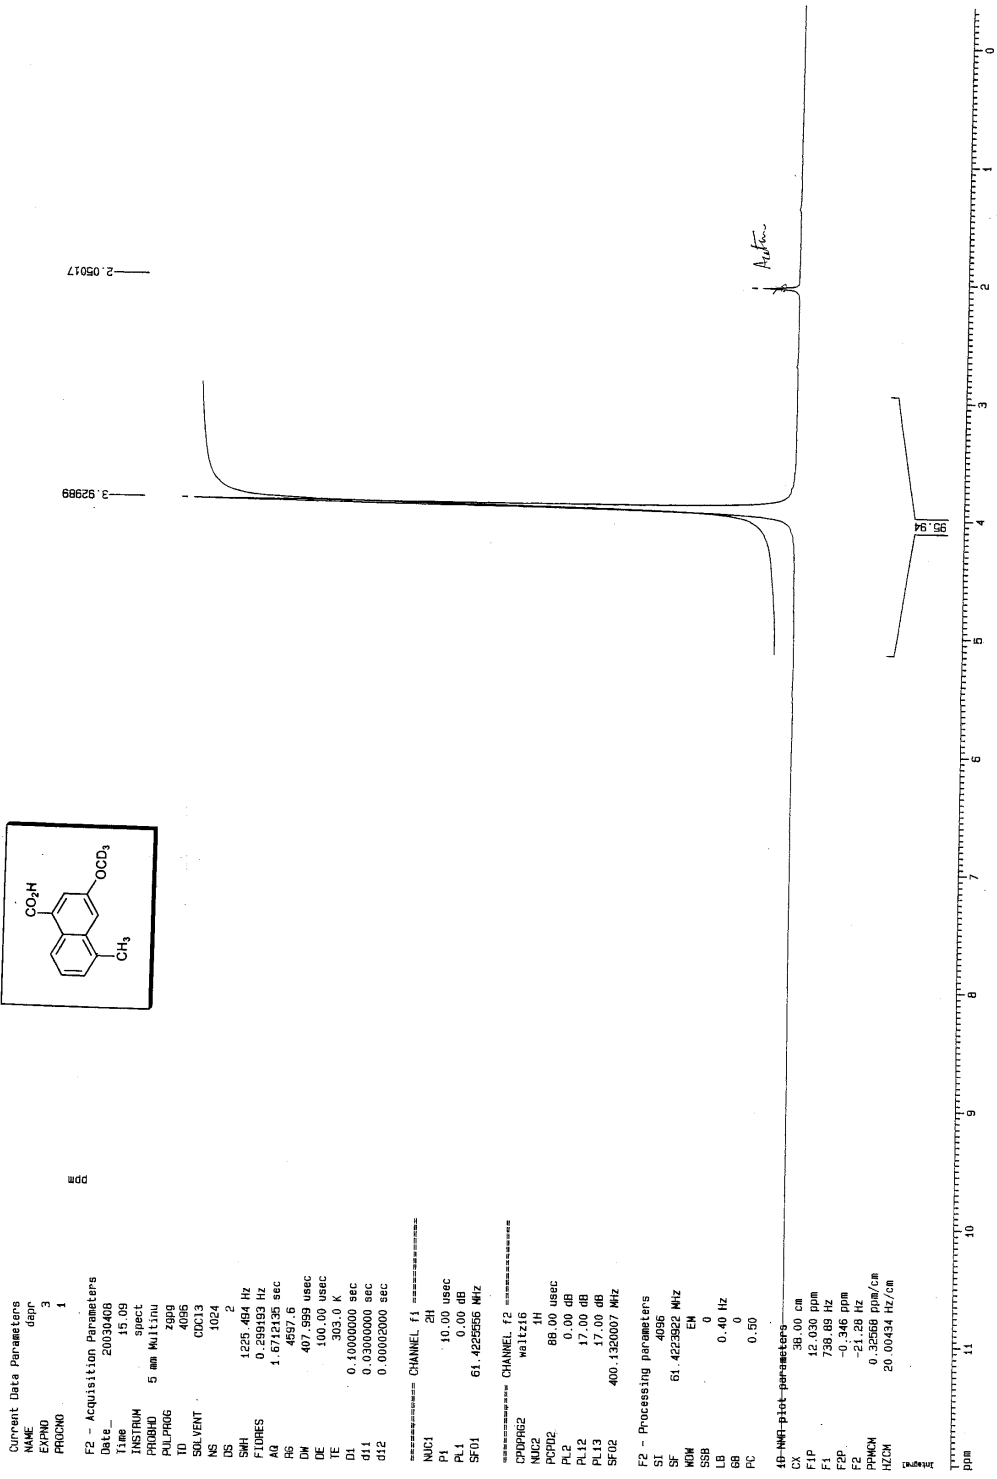

EIMS spectrum of **6b**.

University of Exeter                      School of Chemistry                      Mass Spectrometry Service

|                   |                 |                        |           |
|-------------------|-----------------|------------------------|-----------|
| Submitted By      | Landreau        | Sample Reference       | CL237     |
| Service Reference | GCT03-0597      | Predicted Mol. Formula | C13H9D3O3 |
| Ionisation        | EI <sup>+</sup> | Calculated Exact Mass  | 219.0975  |
| Inlet             | Solids probe    | M/Z Found              | 219.0974  |

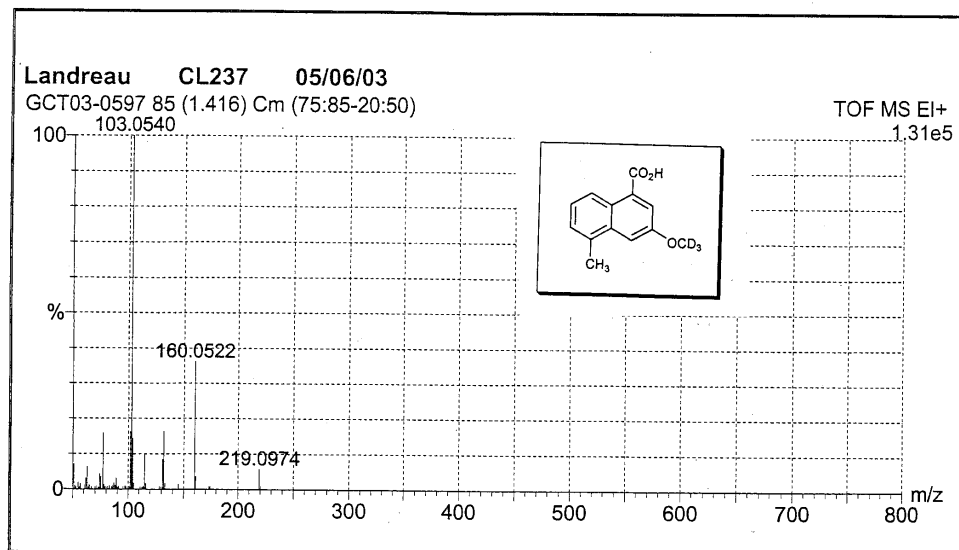

Elemental Composition Report

Single Mass Analysis (displaying only valid results)  
Tolerance = 3.0 mDa / DBE: min = 0.0, max = 50.0

Monoisotopic Mass, Odd and Even Electron Ions  
4029 formula(e) evaluated with 2 results within limits (all results (up to 1000) for each mass)

| Mass     | Calc. Mass | mDa  | PPM  | DBE | Formula             |
|----------|------------|------|------|-----|---------------------|
| 219.0974 | 219.0975   | 0.0  | -0.1 | 8.0 | 12C13 1H9 2H3 16O3  |
|          | 219.0990   | -1.6 | -7.2 | 7.5 | 12C13 1H11 2H2 16O3 |

Operator's Comments

EI+  
Probe at 100 deg C

<sup>1</sup>H NMR spectrum of **4b**.

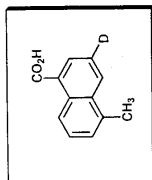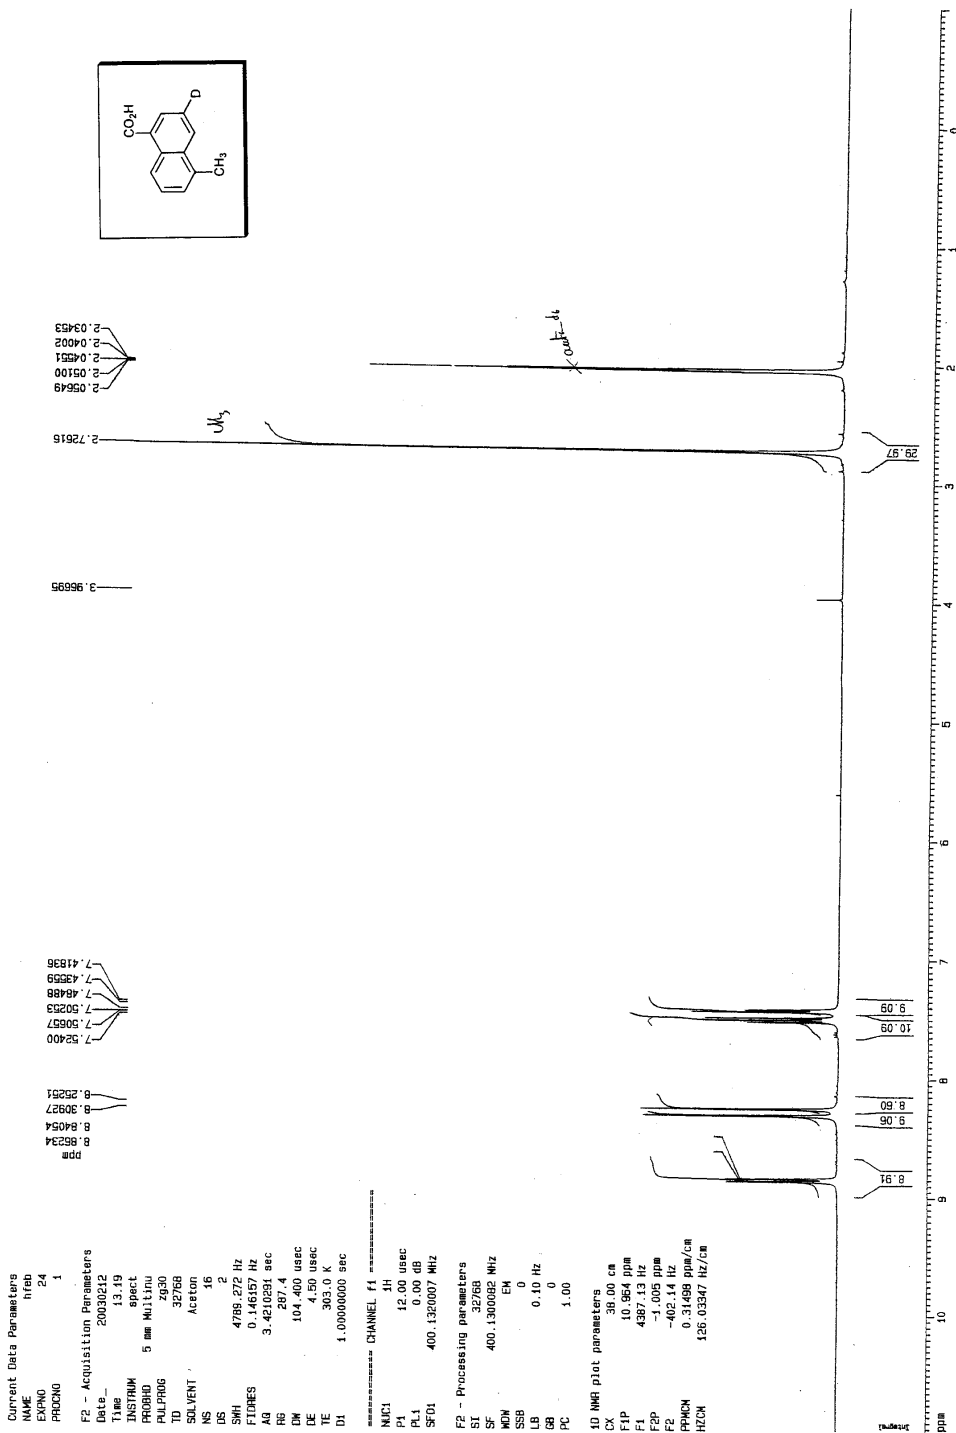

<sup>2</sup>H NMR spectrum of **4b**.

UL 213

Current Data Parameters  
 NAME cfd8  
 EXPNO 6  
 PROCNO 1  
 PPR 1

F2 - Acquisition Parameters  
 Date\_ 20030219  
 Time 14.41

INSTRUM spect  
 PROBDW 5 mm NULINU  
 PULPROG zgpg  
 TD 4096  
 CH13  
 NS 2052  
 DS 2

SWH 1225.484 Hz  
 FIDRES 0.295193 Hz  
 AQ 1.6712135 sec  
 RG 4597.6

DM 467.999 usec  
 DE 100.00 usec  
 TE 303.0 K

D1 0.10000000 sec  
 d11 0.03000000 sec  
 d12 0.00002000 sec

\*\*\*\*\* CHANNEL F1 \*\*\*\*\*

NUC1 2H  
 PL 10.00 usec  
 P1 0.00 dB  
 SF01 61.423826 MHz

\*\*\*\*\* CHANNEL F2 \*\*\*\*\*

CPDPRG2 waltz16  
 NUC2 1H  
 PCHP2 88.00 usec  
 PL2 0.00 dB  
 PL12 17.00 dB  
 PL13 17.00 dB  
 SF02 400.1320007 MHz

F2 - Processing parameters  
 SI 4096  
 SF 61.423827 MHz  
 SFO 61.423827 MHz  
 AS 0  
 LB 0  
 GB 0  
 PC 0.50

40-NMR-parameters-----  
 CX 38.00 cm  
 F1P 12.417 ppm  
 F1 762.71 Hz  
 F2P -0.421 ppm  
 F2 -25.85 Hz  
 PPMCM 0.33785 ppm/cm  
 HZCM 20.75147 Hz/cm

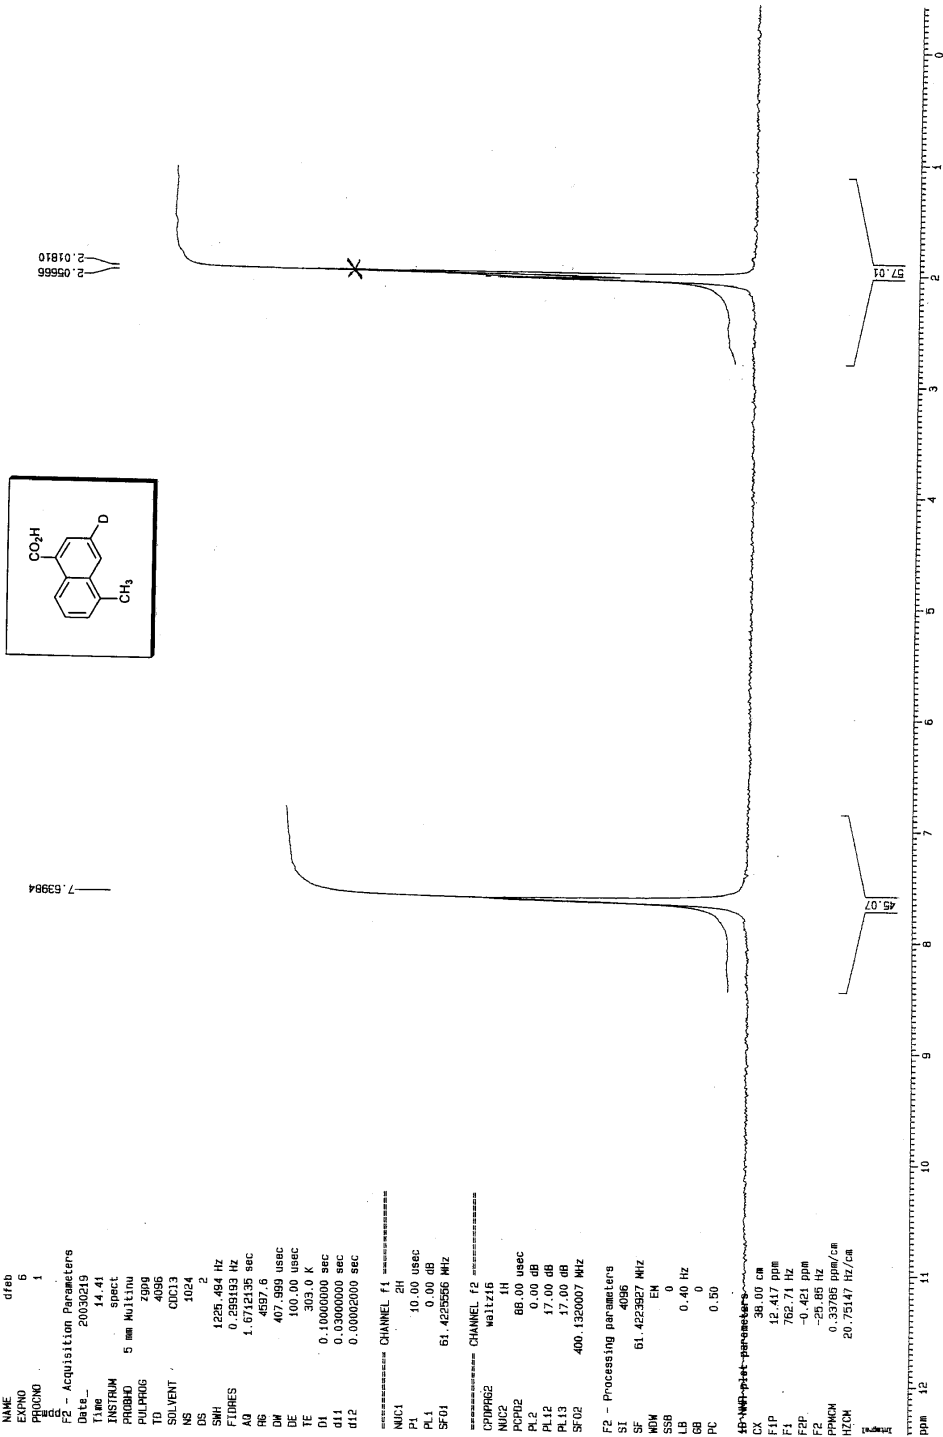

ESMS spectrum of **4b**.

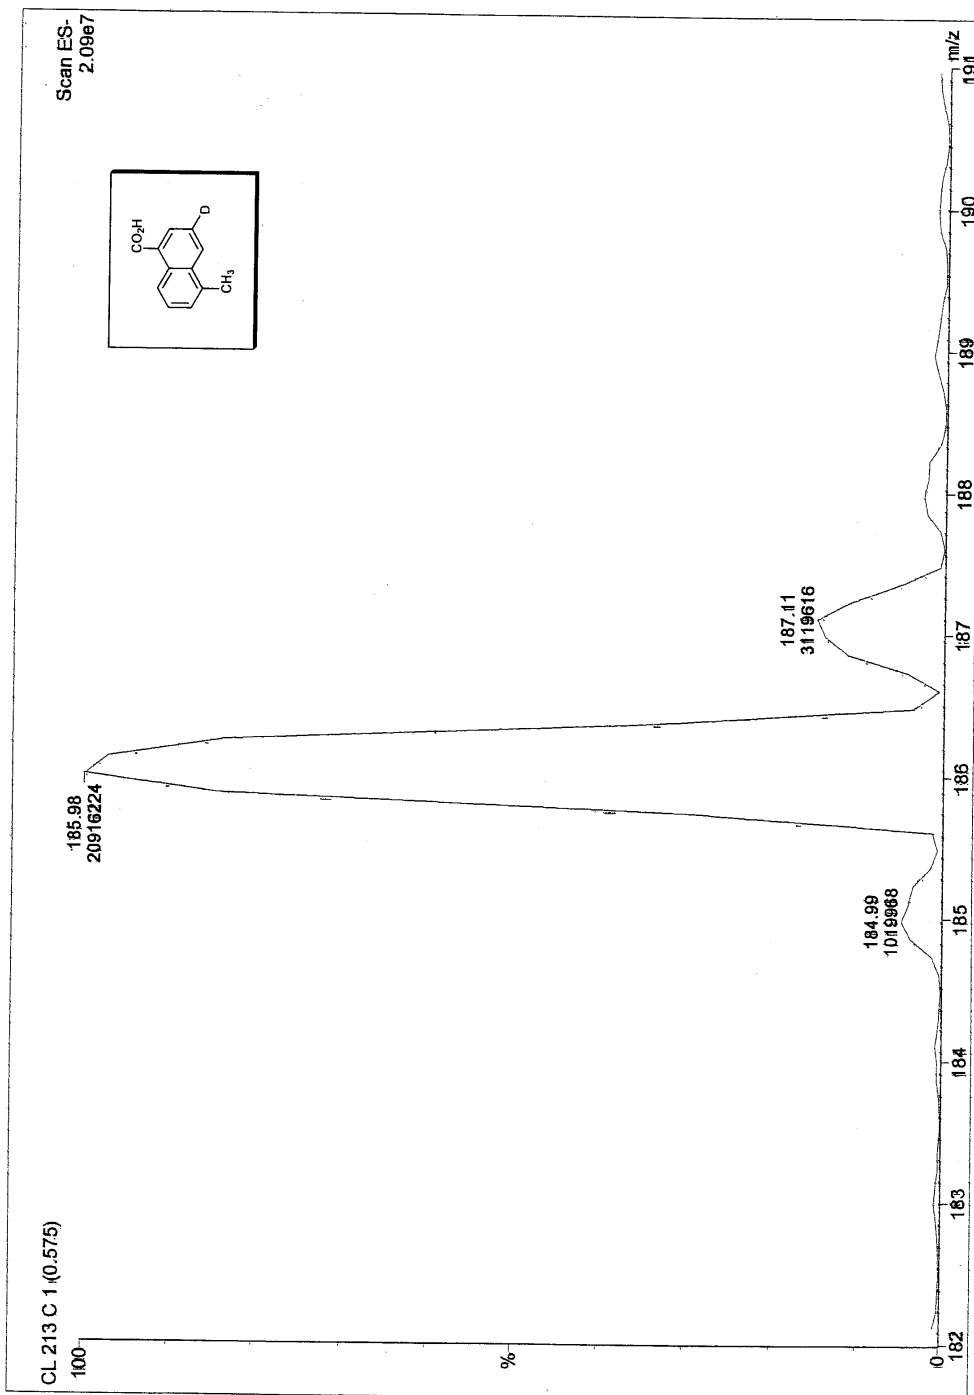

Supplement: b410592c.pdf [file b410592c.pdf]
